# Supplementary material
Source: PubMed Central journal article supplement (PMC7116562)
Supplement: EMS108499-supplement-Supplementary_Methods.pdf [file EMS108499-supplement-Supplementary_Methods.pdf]

694 **Supplementary Methods**

695

696 **Mice**

697 All mouse strains were maintained at the University of California, San Francisco (UCSF)  
698 specific pathogen-free animal facility and all animal protocols were approved by and in  
699 accordance with the guidelines established by the Institutional Animal Care and Use  
700 Committee and Laboratory Animal Resource Center. The day of birth was designated as  
701 Postnatal day 0 (P0).

702 Unless otherwise stated, wild-type Swiss Webster mice were used for histology  
703 and spatial transcriptomics. *Aldh111-GFP* transgenic mice were generated by the  
704 GENSAT project (37). *Emx1-cre* mice were obtained from The Jackson Laboratory (JAX  
705 #005628) (38). *Satb2-flox* mice were a gift from Dr. Ralph Marcucio at UCSF (27).  
706 Conditional knockouts were generated by breeding *Emx1-cre/+; Satb2-flox/+* with  
707 *Satb2-flox/flox* mice to obtain mutants (*cre/+; flox/flox*) and littermate controls  
708 (*cre/+; flox/+*). *Reeler (Reln/Reln)* mice were a gift from Dr. Eric Olson at SUNY Upstate  
709 University (B6C3Fe a/a-Reln; JAX). *Reln/+* mice were used as littermate controls. All  
710 mice were maintained on a mixed background.

711

712 **Mouse tissue preparation**

713 Mice were transcardially perfused at P14 or P56 with ice-cold phosphate buffer saline  
714 (PBS) and 4% paraformaldehyde (PFA) in 1X PBS. Brains were dissected and post-fixed  
715 in 4% PFA for 24 hours at 4°C. Post-fixed brains were cryo-protected in 30% sucrose for  
716 48 hr at 4°C and embedded in optimal cutting temperature compound (Tissue-Tek).  
717 Cryosections (16 microns) were collected on superfrost slides (VWR) using a cryostat  
718 (CM3050S, Leica) and stored at -80°C.

719

720 **Human tissue**

721 Human brain tissue was obtained with informed consent under protocol 16/LO/2168  
722 approved by the NHS Health Research Authority at the Addenbrookes Hospital. Adult  
723 brain tissue biopsies were taken from the site of neurosurgery resection for the original  
724 clinical indication. For the purposes on this study samples were taken from peri-  
725 contusional areas in traumatic brain injury (frontal cortex), lobectomy in epilepsy surgery  
726 (temporal cortex) and peri-tumoural tissue (temporal cortex).

727 Tissue specimens were collected in Addenbrookes Hospital and transferred to a  
728 CL2 facility where it was processed. Tissue was dissected and fixed in 4% PFA for 48-72  
729 hours. Once fixed, samples were placed in 20% Sucrose for cryoprotection for 24-48  
730 hours and mounted in OCT, stored at -80°C.

731 Additional human brain tissue was collected in a de-identified manner with  
732 previous patient consent in strict observance of the legal and institutional ethical  
733 regulations of the University of California, San Francisco (UCSF) Committee on Human  
734 Research. Protocols were approved by the Human Gamete, Embryo and Stem Cell  
735 Research Committee (Institutional Review Board) at UCSF. For this study, one post-  
736 mortem sample was taken from the superior frontal gyrus and processed as above.  
737 Human brain blocks were cryosectioned to 16 microns.

738

739

740 **smFISH assay design and probes**

741 Mouse and human tissue smFISH was performed using the RNAScope LS Multiplex  
742 Assay (Advanced Cell Diagnostics, ACD) (39). In this assay, the smFISH signal-to-noise  
743 ratio (SNR) is amplified by branched DNA complexes formed on target transcripts and  
744 tyramide signal amplification (TSA)-based labeling. Target RNAs are initially hybridized  
745 to a series of single-stranded DNA “z-probes”. Each z-probe is composed of (1) a 18-25  
746 nucleotide region complementary to the target RNA, (2) a spacer sequence, and (3) a 14  
747 nucleotide tail region. These probes are tagged by branched DNA-amplification trees:  
748 pairs of z-probes are hybridized to oligo-preamplifiers, across their bridged tail  
749 sequences, which are then tagged by 20 oligo-amplifiers (Fig 1 A). Each oligo-amplifier  
750 is labeled with 20 Horse Radish Peroxidase (HRP) enzyme molecules. In general, a 1  
751 kilobase region on the target transcript is hybridized by 20 z-probe pairs in tandem,  
752 which can yield up to 8000 HRP labels per each target. The fluorescent smFISH signal is  
753 consequently generated by the addition of tyramide-conjugated fluorophores. Tyramide is  
754 enzymatically converted into a highly oxidized intermediate by HRP that covalently  
755 binds to the proteins at or near the HRP label, depositing a large number of fluorophores  
756 for probe detection (40). The combination of branched DNA and TSA-amplification  
757 significantly boosts the sensitivity and SNR of the RNAScope assay, allowing fast  
758 confocal imaging of large tissue areas with short exposure times (see imaging).

759 *Multiplexed detection:* To achieve 4-plex transcript detection with RNAScope,  
760 target z-probes are assigned to one of four different channels (C1-C4) that contain  
761 distinct tail-sequences. Tissue samples are hybridized to the mixture of C1-C4 probes,  
762 followed by generation of channel-specific amplification trees. Finally, probes are  
763 sequentially developed with TSA through incubation cycles of channel-specific HRP  
764 labels, tyramide-conjugated fluorescent dyes and chemical enzymatic quenchers.

765 *Probe information:* All of the RNAScope probes used in this study and relevant  
766 information including target sequences are listed in Supplementary Table 3. Further  
767 information is readily available from the vendor (<https://acdbio.com/catalog-probes>). To  
768 assess the background signal from the assay, target probes against the bacterial *DapB*  
769 mRNA were used as negative controls. Target probes against mouse and human  
770 housekeeping genes were used as positive controls. In the mouse cortical astrocyte  
771 expression screen, the *Glast* probe was always assigned to C4 and multiplexed with other  
772 probes in C1-C3 channels. With human tissue, the *Glast* probe was assigned to C3 and  
773 multiplexed with C1-C2.

774

775 **Automated smFISH and IHC**

776 All histology on mouse and human brain cryosections was automated on a Leica BOND  
777 RX robotic stainer after manual baking and dehydration. Tissue sections were first  
778 processed for 3 or 4 gene smFISH using the RNAScope LS Multiplex Assay (ACD).  
779 After smFISH, antibody staining was performed using TSA and slides were manually  
780 coverslipped for imaging.

781

782 **i. Baking and dehydration:** Tissue cryosections were removed from -80°C and thawed  
783 at RT for 15 min. Samples were then baked at 65°C for 45 min in vertical position on a  
784 slide holder (Tissue-Tek) in an oven. After baking, samples were dehydrated in a series

785 of 50%, 70%, 100% and 100% ethanol (5 min each) in staining dishes (Tissue-Tek) and  
786 air-dried for 10 min before automated RNAScope.

787

788 **ii. Automated histology design and setup:** For use on the Leica BOND RX, all  
789 histology consumables were transferred to barcoded reagent containers. Staining  
790 protocols that list the order and durations of reagent incubations and washes were created  
791 on the BOND controller software. Slides were assigned unique barcode labels coupled to  
792 staining protocols and placed onto temperature-controlled pads on the instrument. Flow-  
793 through chambers were assembled across the whole slides using plastic coverplates.  
794 During staining, a liquid volume of 150  $\mu$ L was dispensed to each slide on every step  
795 using automated liquid handling. Reagents were flushed at least once before main  
796 incubations to ensure uniform coverage of the slide. Between reagent incubations,  
797 multiple short washes were performed. All incubations were performed at room  
798 temperature unless indicated otherwise. For the 4-plex RNAScope smFISH protocol, a  
799 maximum number of 20 slides could be processed against 10 different probe mixtures in  
800 a single run (e.g. 40 different genes screened across two sets of biological replicates). The  
801 combined multiplexed RNAScope smFISH and IHC protocol for 20 slides ran overnight  
802 on the Leica BOND RX lasting ~17 hours.

803

804 **iii. Automated RNAScope smFISH:** The RNAScope LS Multiplex assay (ACD) was  
805 performed largely according to the instructions from the vendor and modifications are  
806 noted below. Full details of the protocols 4-plex smFISH and the consumables used in  
807 this study are provided in [Supplementary Table 4](#).

808 *4-plex probe hybridization:* To perform 4-plex RNAScope on mouse brain  
809 cryosections, samples were initially permeabilized with heat and protease treatment to  
810 improve probe penetration and hybridization. For heat treatment, P14 and P56 samples  
811 were incubated in BOND ER2 buffer (pH 9.0, Leica) at 95°C for 2 and 5 min,  
812 respectively. For protease treatment, P14 and P56 samples were incubated in ACD  
813 protease reagent at 42°C for 10 and 15 min, respectively. Prior to probe hybridization,  
814 samples were incubated in hydrogen peroxide for 10 min to inactivate endogenous  
815 peroxidases and ACD protease. Following pre-treatment, samples were incubated in  
816 target z-probe mixtures (C1-C4) for 2 h at 42°C. The C2-C4 probes are provided at 50X  
817 concentration by ACD and were diluted 1:50 in C1 probes. In exception, the C4 probe for  
818 the high-expressing *Glast* mRNA was used at 1:100 in the astrocyte screen for reagent  
819 conservation.

820 *smFISH signal amplification:* After probe hybridization, branched DNA  
821 amplification trees were generated through sequential incubations in AMP1, AMP2 and  
822 AMP3 reagents for 15-30 min each at 42°C with LS Rinse buffer high stringency washes  
823 between incubations. Following amplification, probe channels were detected sequentially  
824 via HRP-TSA labeling. To develop the C1-C3 probe signals, samples were incubated in  
825 channel-specific HRP reagents for 15 min at 42°C, TSA fluorophores for 30 min and  
826 HRP blocking reagent for 15 min at 42°C. The probes in C1, C2 and C3 channels were  
827 labeled using Opal 520, 570 and 650 fluorophores (Perkin Elmer, diluted 1:2500)  
828 respectively. Finally, to develop the C4 probe, the Atto425 fluorophore was used for 6-  
829 color imaging on the Operetta system. The C4 probe complexes were first incubated with  
830 TSA-biotin (Perkin Elmer, 1:500) for 30 min, followed by streptavidin-conjugated

831 Atto425 (Sigma, 1:400) for 30 min. Multiple short washes were performed between  
832 incubations throughout the protocol using the BOND Wash buffer (Leica) and deionized  
833 water (full protocol listed on [Supplementary Table 4](#)).

834 *3-plex smFISH*: To perform 3-plex RNAScope on human brain cryosections,  
835 samples were heat-treated for 10 min and incubated in protease for 15 min. Probe  
836 hybridization and branched DNA amplification were performed as described above. To  
837 develop C1-C3 probes, Opal fluorophores (520, 570 and 650) were used at a lower  
838 dilution (1:300) due to higher autofluorescence on postnatal human brain sections. To  
839 distinguish RNA spots from lipofuscin autofluorescence, spots that appear identical  
840 across Opal 520 and 570 channels were filtered out.

841

842 **iv. Automated immunohistochemistry**: RNAScope smFISH was directly followed by  
843 antibody staining for the neuronal marker NEUN on the BOND RX system. To improve  
844 antibody staining after IHC and perform 6-color imaging on the Operetta, the NEUN  
845 signal was amplified using TSA-biotin and the Alexa 700 fluorophore. Samples were first  
846 blocked in antibody blocking solution (Perkin Elmer) for 20 minutes. To block any  
847 available TSA-biotin sites from the smFISH assay, samples were incubated in 0.2%  
848 Avidin (Sigma) for 20 min and 0.05% Biotin (Sigma) for 30 min. After the avidin-biotin  
849 block, samples were incubated in chicken anti-NEUN antibody (Milipore) diluted 1:500  
850 in blocking solution for 1 hr. To develop the antibody signal, samples were incubated in  
851 goat anti-chicken HRP (ThermoFisher, 1:500) for 1 hr, TSA-biotin (1:200) for 10 min  
852 and streptavidin-conjugated Alexa 700 (Sigma, 1:200) for 30 min. Following antibody  
853 staining, samples were incubated in DAPI (Sigma, 0.25 µg/ml) to mark cell nuclei and  
854 washed multiple times in deionized water. After final washes, slides were briefly air-  
855 dried and manually mounted using ~170 µL of Prolong Diamond Antifade (Fisher  
856 Scientific) and standard coverslips (24x50 mm; Fisher Scientific). The full IHC protocol  
857 is listed under [Supplementary Table 4](#).

858

#### 859 **Automated spinning disk confocal imaging**

860 Tissue sections were imaged on an Operetta CLS high-content screening microscope  
861 (Perkin Elmer). To perform 6-color smFISH-IHC imaging, this system was equipped  
862 with 8 LED light sources, 5X air and 40X water objectives, wide-field and spinning disk  
863 confocal imaging modules and narrow band emission filters. The fluorophores, light  
864 sources, exposure times and emission filters used for mouse and human tissue imaging  
865 experiments are listed in [Supplementary Table 5](#). Image acquisition and analysis were  
866 controlled using the Harmony software (Perkin Elmer).

867

868 **i. Tissue identification**: To locate whole tissue sections or ROIs for high-resolution  
869 imaging, entire slides were initially scanned under low magnification in wide-field mode.  
870 Each slide was imaged for nuclear DAPI and NEUN staining if applicable using a 5X NA  
871 0.16 objective (pixel size: 7.2 µm) under 5 minutes. To automatically locate the xy-  
872 coordinates of tissue sections, a Harmony analysis script was used to detect DAPI+ areas.  
873 Whole slide DAPI images were stitched, smoothed with Gaussian blurring and analyzed  
874 with a global threshold. The detected DAPI+ areas were size filtered to remove staining  
875 artifacts and slightly expanded to ensure complete tissue coverage. The resulting areas  
876 were used to automatically set the xy-field positions of the subsequent 40X scan.

877 Alternatively, ROIs for 40X scans were manually selected on low magnification  
878 previews. Selected 40X fields were imaged with a 7% overlap.

879

880 **ii. Confocal imaging:** The high-resolution smFISH images of tissue sections were  
881 acquired on the spinning disk confocal mode using a sCMOS camera and a 40X NA 1.1  
882 automated-water dispensing objective. The field-of-view was 320 x 320  $\mu\text{m}$  and the pixel  
883 size was 298 nm. A P14 mouse brain hemisection comprised 200 to 300 fields depending  
884 on its anatomical position. Each field was imaged as a z-stack consisting of 20 to 30  
885 planes with a 1  $\mu\text{m}$  step size across each color channel. An IR laser was used to auto-  
886 focus on the position of the coverslip and the relative z-heights of tissue sections were  
887 manually identified by imaging DAPI on sample fields prior to tissue-wide scans. Each z-  
888 plane was imaged across 4-6 channels depending on the experiment with exposure times  
889 for mouse smFISH channels between 60 and 120 ms ([Supplementary Table 5](#)). The 40X  
890 multi-channel settings and tissue heights were entered into an experimental layout on  
891 Harmony and automatically executed after low magnification tissue identification scans.

892

### 893 **Image analysis**

894 To segment single neurons and astrocytes and quantify RNA spots from high-resolution  
895 images, analysis scripts were created on Harmony software (Perkin Elmer) using  
896 customizable pre-defined function blocks (*italicized below*). The complete single neuron  
897 and astrocyte segmentation pipelines are provided in [Supplementary Tables 6 and 7](#). Each  
898 40X field was analyzed separately to optimize processing time of large datasets.

899

### 900 **i. Quantification of neuronal gene expression *in situ*:**

901

902 **a. Segmentation of neurons:** Maximum intensity z-projection images were calculated  
903 across each channel to generate 2D images from z-stacks. NEUN+ neurons were  
904 segmented in three steps. **1)** Supervised texture segmentation was performed at a coarse  
905 scale to locate NEUN+ areas on images and filter staining artifacts on tissue sections  
906 (*find texture regions*). Intensity and size thresholding then identified the NEUN+  
907 neuronal soma (*find image region*). **2)** Neuronal nuclei were segmented within the  
908 NEUN+ soma from Gaussian blurred DAPI images using intensity, size and contrast  
909 thresholds (*find nuclei*). **3)** The neuronal cytoplasm was segmented around the nuclei  
910 within the boundaries of the neuronal soma using NEUN intensity thresholding (*find*  
911 *cytoplasm*).

912

913 **b. Filtering single neurons:** Neuron segmentation yielded single neurons as well as  
914 doublets/triplets that overlap in z-projection images and neurons that are partially  
915 contained in tissue sections ([Supplementary Figure 1B](#)). To automatically distinguish  
916 single neurons, morphological (e.g. area, roundness) and intensity (e.g. pixel sum over  
917 DAPI and NEUN) properties of segmented cells were measured and used to train a  
918 supervised linear classifier (*select population*). For the training set, we manually selected  
919 more one hundred single, doublet and partial cells across multiple tissue sections and  
920 cortical areas. The resulting classification was validated across the cortex by manual  
921 inspection of several fields.

922

923 **c. RNA spot calling in neurons:** RNA spots were identified by the detection of local  
924 intensity maxima across each smFISH channel in the neuronal soma (*find spots*).  
925 Individual spots were identified with an upper radius threshold of 750 nm. The number of  
926 RNA spots per single neuron was calculated for each smFISH channel (*calculate*  
927 *properties*). Last, all DAPI+ nuclei were identified across the given field for use in brain  
928 region segmentation (see anatomical annotation below).

929

## 930 **ii. Quantification of astrocyte gene expression in situ:**

931

932 **a. Segmentation of astrocytes:** Maximum intensity z-projection images were generated  
933 as above. Background illumination profiles of fluorescent channels were mapped to  
934 correct uneven illumination (*flatfield correction*). *Glast+* astrocytes were segmented in  
935 three steps: **1)** Supervised texture segmentation was performed at a fine scale to identify  
936 *Glast+* astrocyte cytoplasm and main processes (*find texture regions*). To train texture  
937 analysis, over a hundred points were selected inside versus outside *Glast+* cortical  
938 astrocytes across several tissue sections. Astrocyte cell areas were then filtered by size to  
939 remove partial cells and holes across astrocyte nuclei, which are weakly labeled by *Glast*  
940 smFISH, were filled (*select region*). **2)** Astrocyte nuclei were segmented within *Glast+*  
941 cell areas from Gaussian blurred DAPI images using intensity, size and contrast  
942 thresholds (*find nuclei*). To remove false positive non-astrocyte nuclei that overlap with  
943 astrocyte processes in z-projections, additional morphology and *Glast* intensity filters  
944 were used (*select population*). **3)** The astrocyte cytoplasm and processes were segmented  
945 around the nuclei within the cell areas using *Glast* intensity thresholding (*find*  
946 *cytoplasm*).

947

948 **b. Filtering single astrocytes:** To remove overlapping astrocyte doublets and partial  
949 cells, cells were filtered based on morphological (e.g. area, roundness) and intensity (e.g.  
950 pixel sum over DAPI and *Glast*) properties. As shown in [Supplementary Figure 11](#), upper  
951 layer astrocytes were slightly larger consistent with previous reports (7) and showed  
952 higher *Glast* levels than those in deep layers. This analysis identified similar numbers of  
953 astrocytes across cortical areas in technical replicates ([Supplementary Figure 11](#)). Manual  
954 validation of this pipeline across ten tissue sections from two biological replicates  
955 covering multiple cortical areas (somatosensory, visual, auditory) showed that >90% of  
956 astrocytes were correctly identified using this pipeline.

957 Given their intimate cell-cell interactions, astrocyte processes occasionally  
958 overlapped with neuronal soma and other nuclei in maximum-z projection images. To  
959 remove overlapping non-astrocyte nuclei, the DAPI signal in the astrocyte cytoplasm was  
960 identified with intensity thresholding and subtracted from the *Glast+* cell area (cytoDAPI  
961 filtered cells, [Fig 2C](#)). To remove overlapping neurons, NEUN signal was used to  
962 segment neurons as above. Astrocytes that significantly overlap with neurons were  
963 discarded (>50% overlap between the astrocyte nuclei and neuronal soma). NEUN+  
964 neurons were then subtracted from the cytoDAPI-filtered *Glast+* cell area ([Fig 2C](#)),  
965 resulting in astrocytes filtered against overlapping neurons and nuclei.

966

967 **c. RNA spot calling:** RNA spots were quantified across single astrocytes as elaborated  
968 for neuron previously. In addition to the filters used above, cells that are high-expression

969 outliers (above 99.5% of spot counts per gene across the brain) were also filtered out.  
970 RNA spots in neurons, cytoDAPI-filtered and double-filtered astrocytes were also  
971 quantified.

972

### 973 **iii. Data processing:**

974 The analysis was performed on a desktop workstation with two 6-core Intel i7-4930K 3.4  
975 GHz CPUs and 64 GB of RAM. The neuronal dataset shown in Fig 1, consisting of 10  
976 tissue sections and ~300,000 images, was analyzed under 6 hours. The data was exported  
977 from Harmony as a single cell matrix showing cell coordinates, morphological and  
978 intensity measurements, and RNA spot counts per cell. Brain region segmentation was  
979 performed in MATLAB (described below). Data organization and plotting were done in  
980 R.

981

### 982 **Anatomical annotation of mouse cortical layers and areas**

983 For mapping neuron and astrocyte subtypes across the cortex, one P14 mouse brain  
984 hemisphere was sectioned along the coronal plane to generate an 8-slide series containing  
985 10 sections each. One slide was used to map the expression of cortical layer neuron  
986 markers (Fig 1) and the remaining slides were assayed with layer astrocyte markers (Fig  
987 3 and 6). The cortical layers and areas were annotated using NEUN and DAPI staining as  
988 well as layer neuron marker expression patterns as anatomical landmarks (see  
989 Supplementary Figure 7 for areas). The Paxinos (*P6, plates 9 to 40*) and Allen Mouse  
990 Brain ISH Atlases (*P56, sections 38 to 88*) were used as anatomical references. Cortical  
991 areas were annotated broadly across the anterior-posterior and dorso-ventral axes,  
992 grouping functionally related areas (e.g. the anterior division of the somatosensory cortex  
993 contains the mouth and limb areas). The list of cortical area abbreviations and groupings  
994 are listed under Sup Table 8.

995 For screening layer astrocyte gene expression (Fig 2), two P14 mouse brain  
996 hemispheres (biological replicates) were sagittally sectioned to generate 18 slides. Each  
997 slide contained 4 sections through the somatosensory cortex from each replicate,  
998 corresponding to the areas used for RNAseq profiling of layer astrocytes.

999 For examining cortical layers in *Satb2* cKO and *Reeler* mice (Fig 5), three coronal  
1000 sections through the somatosensory barrel cortex were collected from littermate control  
1001 and mutant brains (n=3 biological replicates each). Each slide contained sections from  
1002 one control and one mutant brain.

1003 To normalize the layer depth of neurons across cortical areas, we automatically  
1004 measured the normalized distance between individual neurons, cortical pia and white  
1005 matter using the slideSegmenter application below.

1006

### 1007 **Manual segmentation of brain regions**

1008 Brain areas were manually segmented on low magnification (5X) images of DAPI/NEUN  
1009 stained brain sections. These segmentation masks were overlaid on xy-coordinates of  
1010 high-magnification (40X) scans to annotate single cells. The offset between 5X and 40X  
1011 objectives was manually corrected by aligning DAPI+ nuclei (identified across all cells in  
1012 each field at the end of segmentation pipelines). To stitch images from Harmony, draw  
1013 and name segmentation masks, align low-high magnification data and perform batch  
1014 segmentations, the slideSegmenter application was created to work on the MATLAB

1015 environment and made publicly available  
1016 (<https://bitbucket.org/alexmatlab/slidesegmenter/>).

1017

1018

### 1019 **Identification of neuronal subtypes from smFISH data**

1020 To identify cortical neuron subtypes in an unbiased manner from smFISH data, we  
1021 adopted the following workflow:

1022

1023 **i. Filtering and normalization:** For downstream analysis, neurons were 1) selected from  
1024 the 8 broad cortical areas that show the full complement of layers with respect to the 4  
1025 genes profiled; and 2) filtered with a minimum cumulative spot-count threshold of 20.  
1026 Spot counts then had a value of 1 added and were log transformed (log(spot counts +1)).

1027

1028 **ii. Clustering:** Clustering was performed for cells from each region individually with the  
1029 4 genes profiled using graph-based clustering implemented by Seurat (FindClusters  
1030 function, resolution 0.5) (41). Briefly, a K-nearest neighbor graph based on Euclidean  
1031 distance is constructed from the expression values for each cell. Edges between cells  
1032 were weighted based on shared overlap in neighborhoods determined by Jaccard distance.  
1033 Cells were iteratively grouped together with the goal of optimizing the density of links  
1034 inside communities as compared to links between communities.

1035

1036 **iii. tSNE:** For visualization, t-distributed stochastic neighbor embedding (tSNE)  
1037 coordinates were calculated from the expression values for each cell (independent of the  
1038 clustering) using perplexity 250 with Seurat (RunTSNE function). tSNE plots were then  
1039 colored by the cluster assignments derived above, gene expression values, or other  
1040 features of interest.

1041

1042 **iv. Hierarchical clustering:** The mean expression profiles of each of the Seurat clusters  
1043 derived from each brain region were taken and hierarchically clustered together based on  
1044 Euclidean distance using Ward.D2 clustering (hclust(dist, method = "ward.D2") R  
1045 function). The resulting dendrogram was then cut at height 1.9 yielding 18 groups  
1046 (cutree(hc, h = 1.9) R function). These groups were manually annotated to 10 major  
1047 subtypes based on high expression differences ([Supplementary Figure 5](#)) and similarity  
1048 among the spatial distributions of identified groups.

1049

### 1050 **Cortical layer and purified layer astrocyte RNA-Seq**

1051

1052 **i. Cortical layer dissection:** *Aldh1L1-GFP*<sup>+</sup> mice were transcardially perfused at P14  
1053 with ice-cold Hanks Balanced Solution (HBSS) to wash away the blood. Brains were  
1054 dissected and cortical hemispheres were cut sagittally on a vibratome in ice-cold HBSS to  
1055 300  $\mu$ m thick sections. Sections from 8 littermate pups were pooled for each experiment  
1056 (n=3 biological replicates for astrocyte purification and n=2 biological replicates for  
1057 whole layer RNA extractions) and microdissected to separate upper (L2-4) and deep (L5-  
1058 6) cortical layers. The L4 of the somatosensory barrel cortex, which appears as dark  
1059 barrels separated by light septa under bright-field illumination, was used as an anatomical  
1060 landmark for layer microdissections ([Supplementary Figure 8](#)). To prevent contamination



1061 with white matter astrocytes, the most superficial layers that contain pial and L1  
1062 astrocytes, and the deep subcortical white matter that contains fibrous astrocytes were  
1063 discarded. For each experiment, the dissections were completed under 90 min and the  
1064 tissue was kept in ice-cold HBSS.

1065  
1066 **ii. Flow cytometry:** To purify cortical layer astrocytes, tissue dissociation was performed  
1067 as described previously (17). Briefly, cortical layer tissue were minced with a forceps and  
1068 enzymatically dissociated with papain (20 U/mL) in dissociation buffer (glucose 22.5  
1069 mM, EDTA 0.5 mM, phenol red), L-cysteine (1 mM) and DNase (125 U/mL) for 80 min  
1070 at 33°C. Tissue was then washed in inhibitor solution (dissociation buffer with  
1071 ovomucoid (1.0 mg/mL)) and centrifuged for 5 min at 200 g. Supernatant was discarded,  
1072 the tissue was resuspended in the inhibitor buffer and mechanically disrupted using a  
1073 P1000 pipette. Dissociated cells were layered onto inhibitor buffer with concentrated  
1074 ovomucoid (5 mg/mL) and centrifuged 5 min at 200 g. Finally, the cell pellet was  
1075 resuspended in staining medium with DAPI. *Aldh1l1-GFP<sup>+</sup>* and *Aldh1l1-GFP<sup>-</sup>* cells were  
1076 sorted as previously described (8) on a BD FACS Aria II and gated on forward/side  
1077 scatter, live/dead by DAPI exclusion, and GFP, using GFP and DAPI controls to set gates  
1078 for each experiment ([Supplementary Figure 8](#)).

1079  
1080 **iii. RNA sequencing and analysis:** Total RNA from FACS-purified cortical layer  
1081 astrocytes and whole cortical layers was extracted with Trizol LS (Invitrogen) and  
1082 purified using the RNeasy Kit (Qiagen). cDNA was generated from full-length RNA  
1083 using the NuGEN RNA-Seq V2 kit that employs the single primer isothermal  
1084 amplification method to deplete ribosomal RNA, and sheared by Covaris to yield uniform  
1085 size fragments. RNASeq libraries were generated using the NuGen Ultralow kit for  
1086 adapters, barcoding, and amplification and purified using the Agencourt XP magnetic  
1087 beads, quality controlled with an Agilent bioanalyzer, and quantified by qPCR.

1088 Five libraries were pooled per lane across three lanes for single end (SE50)  
1089 sequencing on a HiSeq 4000. Read quality was assessed using FastQC (version 0.11.4)  
1090 and 5 nucleotides at the 5' end were trimmed. 45 nucleotide long reads were aligned to  
1091 the mouse reference genome (Ensembl GRCm38) using TopHat2 (version 2.0.11) (42).  
1092 The multiple hit parameter was (-g) was set to 1 to exclude reads with multiple genomic  
1093 alignments. On average, 68 million reads were uniquely mapped to each sample (range  
1094 59-87M). Read counts per gene were calculated using SAMtools (version 0.1.19) (43)  
1095 and HTSeq (version 0.6.1p1) with default parameters (44). DESeq2 (45) was used to  
1096 detect differentially expressed genes amongst upper and deep layer astrocytes (n=3  
1097 biological replicates) and whole cortical layers (n=2 replicates). Purified deep layer  
1098 astrocytes showed low levels of contaminating oligodendrocyte marker gene expression  
1099 (e.g. MBP); these genes were excluded from analysis using a mild astrocyte-specific  
1100 expression threshold (astrocyte vs whole layer expression > 0.1). To identify the top  
1101 differentially expressed genes between upper and deep gray matter astrocytes, an  
1102 expression threshold of 5 FPKM was used with a false-discovery rate (FDR) < 0.05. The  
1103 resulting list of 159 differentially expressed layer astrocyte genes is provided in  
1104 [Supplementary Table 9](#).

1105  
1106

1107 **Spatial reconstruction of astrocyte layer heterogeneity:**

1108

1109 **i. Pre-processing of astrocyte scRNA-seq data:** Single cell RNA-sequencing data of  
1110 P56 cortical astrocytes was obtained from Batiuk and Martirosyan et al (23) which used a  
1111 modified version of Smart-seq2 protocol. Number of unique molecules (UMI) was  
1112 estimated from raw read counts with Census method from Monocle package (46). UMI  
1113 version of the data was normalised with size factors according to standard scater  
1114 workflow (47).

1115

1116 **ii. Spatial reconstruction:** We reconstructed spatial profiles of genes measured with  
1117 scRNA-seq using a published method (22). Implementation of the method in Matlab was  
1118 provided by Shalev Itzkovitz, see original publication for the description of  
1119 implementation details. Here we summarize the method.

1120

1121 **a. Constructing the prior on the number of reads for markers genes in scRNA-seq**  
1122 **cells:** Molecule counts of genes from the processing step of image analysis were fit by a  
1123 Gamma distribution for each gene  $i$  and spatial bin  $j$ .

1124

1125 (1)  $sc_{ij} = \text{Gamma}(os_{ij}, or_{ij})$

1126 Where  $sc$  is spot counts,  $os$  is observed shape of gamma distribution, and  $or$  is  
1127 observed rate.

1128 To match this distribution to the statistical properties of scRNA-seq data and produce the  
1129 prior distribution of scRNA-seq reads for each gene  $i$  and spatial bin  $j$  the following  
1130 correction was applied for each scRNA-seq cell  $c$ :

1131

1132 (2)  $f_c = \left(\frac{sc}{sm}\right)$

1133 Where  $f$  is the distribution rescaling factor,  $s$  is scRNA-seq sampling constant,  $sm$  is  
1134 smFISH sampling constant

1135 (3)  $p_{ijc} = \frac{f_c}{(or_{ij} + f_c)}$

1136 where  $p$  is negative binomial probability

1137 (4)  $prc_{ijc} = \text{NegativeBinomial}(r = os_{ij}, p_{ijc})$

1138 Where  $prc$  is the prior on expected single cell RNA-seq reads for each marker gene,  
1139 bin and cell

1140

1141 smFISH sampling factor reflects the expected proportion of the total number of  
1142 transcripts in a cell captured in smFISH images (we used 0.15). scRNA-seq sampling  
1143 factor reflects the proportion of total number of transcripts (approximated as 180000)  
1144 captured by scRNA-seq for each cell measured. The total number of transcripts was  
1145 chosen based on Halpern et al that examined hepatocytes: 180000 is roughly 1/4 of  
1146 hepatocyte molecule number: 1/2 to account to tetraploidy and 1/2 to account for smaller  
1147 cell size of astrocytes. In practice, sampling levels are computed for 8 bins of cells with  
1148 similar sampling levels (e.g. 0-0.1%, 0.1%-0.3% ...) to speed up the Monte Carlo

1149 sampling used to construct the prior. We used 5 spatial bins (j) for equally sized intervals  
1150 of cortical depth.

1151

1152 **b. Using the prior to assign cells to spatial bins.** To find the probability of each  
1153 scRNA-seq cell coming from spatial bin j given the expression of spatial markers we  
1154 used Bayes' formula:

1155

$$1156 \quad (5) P(Bin_j | gene_i reads) = \frac{P(gene_i reads | prc_{ijc}) * P(cells in Bin_j)}{\sum_{bin j=1}^{bin 5} P(gene_i reads | prc_{ijc}) * P(cells in Bin_j)}$$

1157

1158 where  $P(cells in Bin_j)$  is the proportion of cells in spatial bin j, and the prc prior on  
1159 reads comes from Equation (4).

1160

1161 The method assumes that expression of different genes is independent and the probability  
1162 of assignment to spatial bins is computed as:

1163

$$1164 \quad (6) P(Bin_j | gene_{i-n} reads) = \prod_{gene i=1}^{gene n} P(Bin_j | gene_i reads)$$

1165

1166 This result in posterior probability matrix of cells by bins. A probability weight matrix is  
1167 obtained by normalizing the column sums to one

1168

1169 **c. Reconstructing expression of genes across spatial bins.** The probability weight  
1170 matrix, P and the scRNA-seq expression matrix, E, are combined to obtain spatial  
1171 profiles as a genes by bins matrix as a weighted average ([Supplementary Tables 10 and](#)  
1172 [11](#)).

1173

$$1174 \quad (7) S = E * P$$

1175

1176 **d. Identifying significantly zonated profiles.** To find which profiles are significantly  
1177 zonated we assigned cells to the spatial bin with highest posterior probability. The  
1178 Kruskal–Wallis test was used to find which genes are significantly different between cells  
1179 assigned to different spatial bins.

1180

1181 **e. Leave one out validation.** To benchmark the model we used leave one out analysis  
1182 ([Supplementary Figure 18](#)). We used 15 genes with smFISH profiles to reconstruct one  
1183 left-out gene and compared the reconstructed profile to the average expression observed  
1184 with smFISH. To measure the similarity of predicted and observed profiles we used  
1185 Kullback–Leibler divergence base on the relative differences in expression between  
1186 spatial bins rather than absolute number of genes per bin.

1187

### 1188 **Manual immunohistochemistry:**

1189

1190 Cryosections from *Aldh1L1-GFP* mice were manually stained for GFP, astrocyte and  
1191 neuron marker antibodies. Samples were subjected to heat-induced antigen retrieval in  
1192 10mM sodium citrate (pH 6) buffer for 5 min at 75°C, then permeabilized and blocked in  
1193 10% goat serum in 1X PBS with 0.1% Triton X-100 (PBST) for 1 h. Primary antibodies

1194 were diluted in the blocking solution and incubated O/N at 4°C. After multiple PBST  
1195 washes, samples were incubated in secondary antibodies and DAPI diluted in blocking  
1196 solution for 1 h. After PBS and dH<sub>2</sub>O washes, samples were mounted using  
1197 Fluoromount-G (SouthernBiotech). The following primary antibodies were used: chicken  
1198 GFP (GFP-1020, Aves, 1:2000), mouse NEUN (MAB377, Millipore, 1:500), rabbit GS  
1199 (G2781, Sigma, 1:2000) and rabbit pSmad (13820S, Cell Signaling, 1:200). Goat  
1200 secondary antibodies conjugated to Alexa fluorophores (Molecular Probes) were used for  
1201 labeling. The *Aldh1L1-GFP* samples were imaged on a Leica TCS SPE laser confocal  
1202 microscope with a 40x oil immersion objective.

1203

#### 1204 **Statistics:**

1205

1206 The violin plots in Figure 1D, Supplementary Figures 2B-C, 11C and 21C and the box  
1207 plots in Supplementary Figure 20A-B were plotted to show the data distribution as  
1208 follows. The lower, middle and upper hinges correspond to 25, 50 (median) and 75  
1209 percentiles. The whiskers show data points within 1.5 times the interquartile range  
1210 (distance between the first and the third quartiles) of the 25 and 50 percentiles.

1211

1212 No statistical methods were used to pre-determine sample sizes but our sample sizes are  
1213 similar to those reported previously (10-12). smFISH data (RNA spot counts per cell) and  
1214 scRNAseq data distribution was assumed to be Gamma-Poisson but this was not formally  
1215 tested.

1216

1217 For layer switch experiments (Figure 5), data collection and analysis were performed  
1218 blind to the genotypes of the animals. Animals were randomly allocated to experimental  
1219 groups. Two-tailed Student's t-tests were used to assess statistical significance in layer  
1220 switch experiments (Figure 5).

1221

#### 1222 **Data Availability:**

1223

1224 The raw bulk RNA-sequencing data are available at the Gene Expression Omnibus  
1225 (GEO) under the accession code GSE140822. The single cell RNA-sequencing data will  
1226 be made available under <https://holt-sc.gliolab.org/sc/>. Other data are available as  
1227 Supplementary Materials or from the corresponding author upon request.

1228

#### 1229 **Code Availability:**

1230

1231 The code for spatial reconstruction of single cell astrocyte RNA-sequencing can be found  
1232 at [https://github.com/vitkl/cortical\\_astrocyte\\_mapping](https://github.com/vitkl/cortical_astrocyte_mapping). The SlideSegmenter code is available  
1233 at <https://bitbucket.org/alexmatlab/slidesegmenter/src/master/>. The Harmony image  
1234 analysis scripts are provided as Supplementary Materials. Other code is available upon  
1235 request.

1236

1237

1238

1239

1240 **Supplementary Methods References:**

- 1241 37. Gong S, Zheng C, Doughty ML, Losos K, Didkovsky N, Schambra UB, et al. A gene  
1242 expression atlas of the central nervous system based on bacterial artificial chromosomes.  
1243 Nature. 2003 Oct 30;425(6961):917–25.
- 1244 38. Gorski JA, Talley T, Qiu M, Puelles L, Rubenstein JLR, Jones KR. Cortical Excitatory  
1245 Neurons and Glia, But Not GABAergic Neurons, Are Produced in the Emx1-Expressing  
1246 Lineage. Journal of Neuroscience. Society for Neuroscience; 2002 Aug 1;22(15):6309–14.
- 1247 39. Wang F, Flanagan J, Su N, Wang L-C, Bui S, Nielson A, et al. RNAscope. The Journal of  
1248 Molecular Diagnostics. 2012 Jan;14(1):22–9.
- 1249 40. Kerstens HM, Poddighe PJ, Hanselaar AG. A novel in situ hybridization signal  
1250 amplification method based on the deposition of biotinylated tyramine. J Histochem  
1251 Cytochem. 1995 Aug 4;43(4):347–52.
- 1252 41. Butler A, Hoffman P, Smibert P, Papalexi E, Satija R. Integrating single-cell  
1253 transcriptomic data across different conditions, technologies, and species. Nat Biotechnol.  
1254 Nature Publishing Group; 2018 Jun;36(5):411–20.
- 1255 42. Kim D, Pertea G, Trapnell C, Pimentel H, Kelley R, Salzberg SL. TopHat2: accurate  
1256 alignment of transcriptomes in the presence of insertions, deletions and gene fusions.  
1257 Genome Biol. BioMed Central; 2013 Apr 1;14(4):R36.
- 1258 43. Li H, Durbin R. Fast and accurate short read alignment with Burrows-Wheeler transform.  
1259 Bioinformatics. 2009 Jul 15;25(14):1754–60. PMID: PMC2705234
- 1260 44. Anders S, Pyl PT, Huber W. HTSeq—a Python framework to work with high-throughput  
1261 sequencing data. Bioinformatics. Oxford University Press; 2015 Jan 15;31(2):166–9.
- 1262 45. Love MI, Huber W, Anders S. Moderated estimation of fold change and dispersion for  
1263 RNA-seq data with DESeq2. Genome Biol. BioMed Central; 2014 Dec 1;15(12):550.
- 1264 46. Qiu X, Hill A, Packer J, Lin D, Ma Y-A, Trapnell C. Single-cell mRNA quantification and  
1265 differential analysis with Census. Nat Methods. 2017 Jan 23. PMID: PMC5330805
- 1266 47. Lun ATL, McCarthy DJ, Marioni JC. A step-by-step workflow for low-level analysis of  
1267 single-cell RNA-seq data with Bioconductor. F1000Research. Faculty of 1000 Ltd;  
1268 2016;5:2122. PMID: PMC5112579

1269

1270

1271

1272

1273

1274

1275

1276

1277

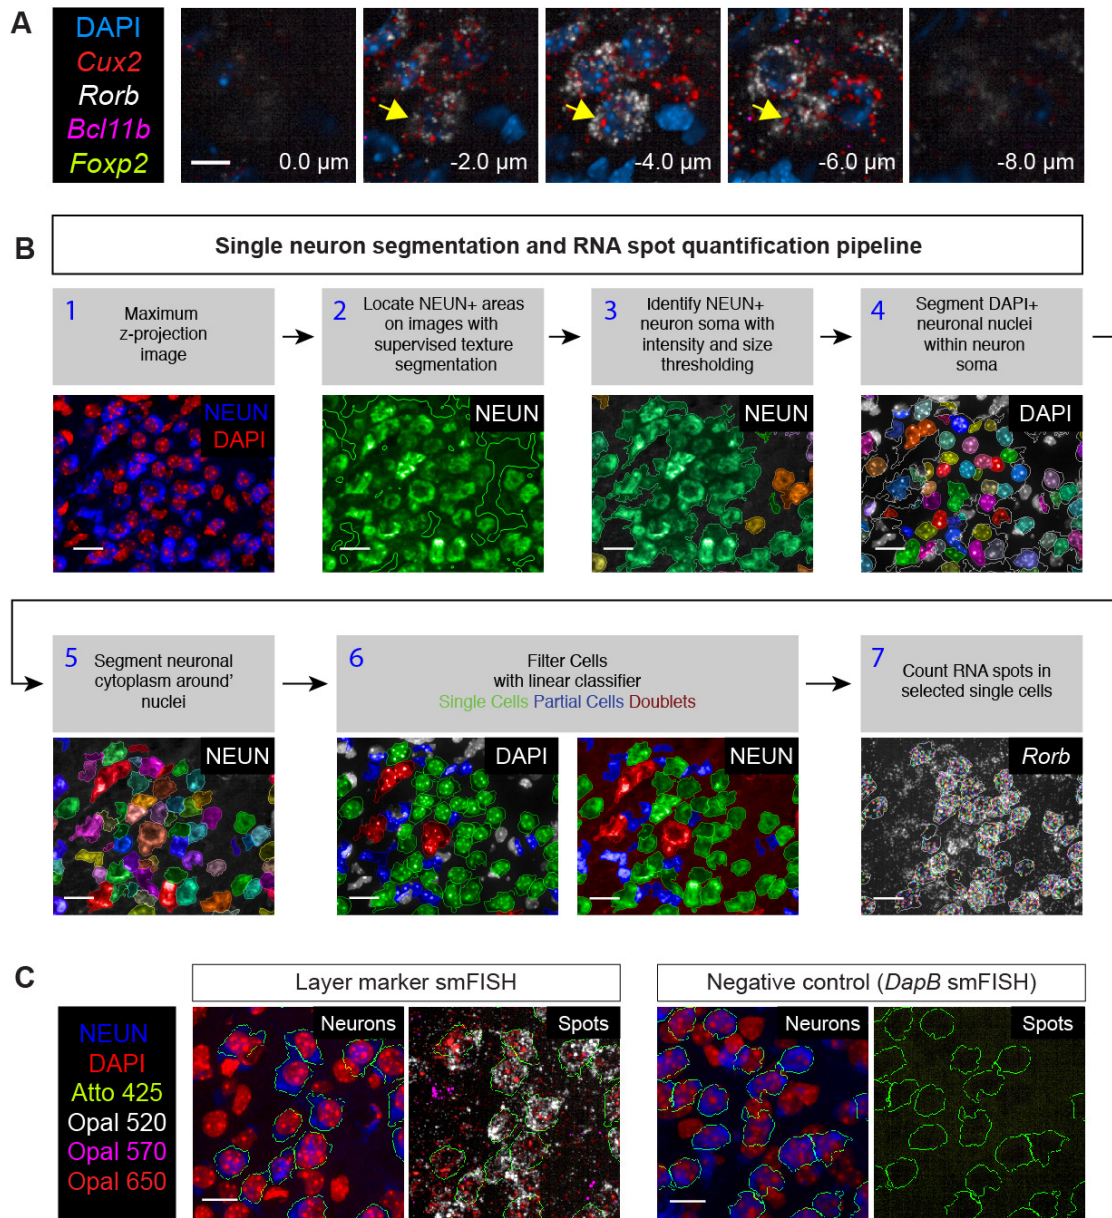

1279  
 1280  
 1281  
 1282  
 1283  
 1284  
 1285  
 1286  
 1287  
 1288  
 1289  
 1290  
 1291  
 1292  
 1293

**Supplementary Figure 1: Single neuron image analysis and gene expression quantification pipeline.**

A) Individual 40X z-planes throughout *Rorb*<sup>+</sup> L4 neurons. Arrow indicates a single neuron across multiple z-positions. Nuclei are marked by DAPI. For neuronal segmentation, the z-stack is collapsed into a single plane via a maximum intensity projection.

B) Segmentation of NEUN<sup>+</sup> neurons and quantification of gene expression in single neurons.

C) RNAScope smFISH assay shows high signal-to-noise ratio. The background signal is assessed by comparing smFISH against layer neuron markers to bacterial *DapB* transcript negative control (targeted with four different probes in different channels). *DapB* smFISH shows little to no signal on mouse tissue sections, as expected. Quantification shown in Supplementary Figure 2. *n*=12 mice independently assayed, 3-10 tissue sections per replicate imaged.

Scalebars: (A) 10  $\mu$ m, (B,C) 20  $\mu$ m

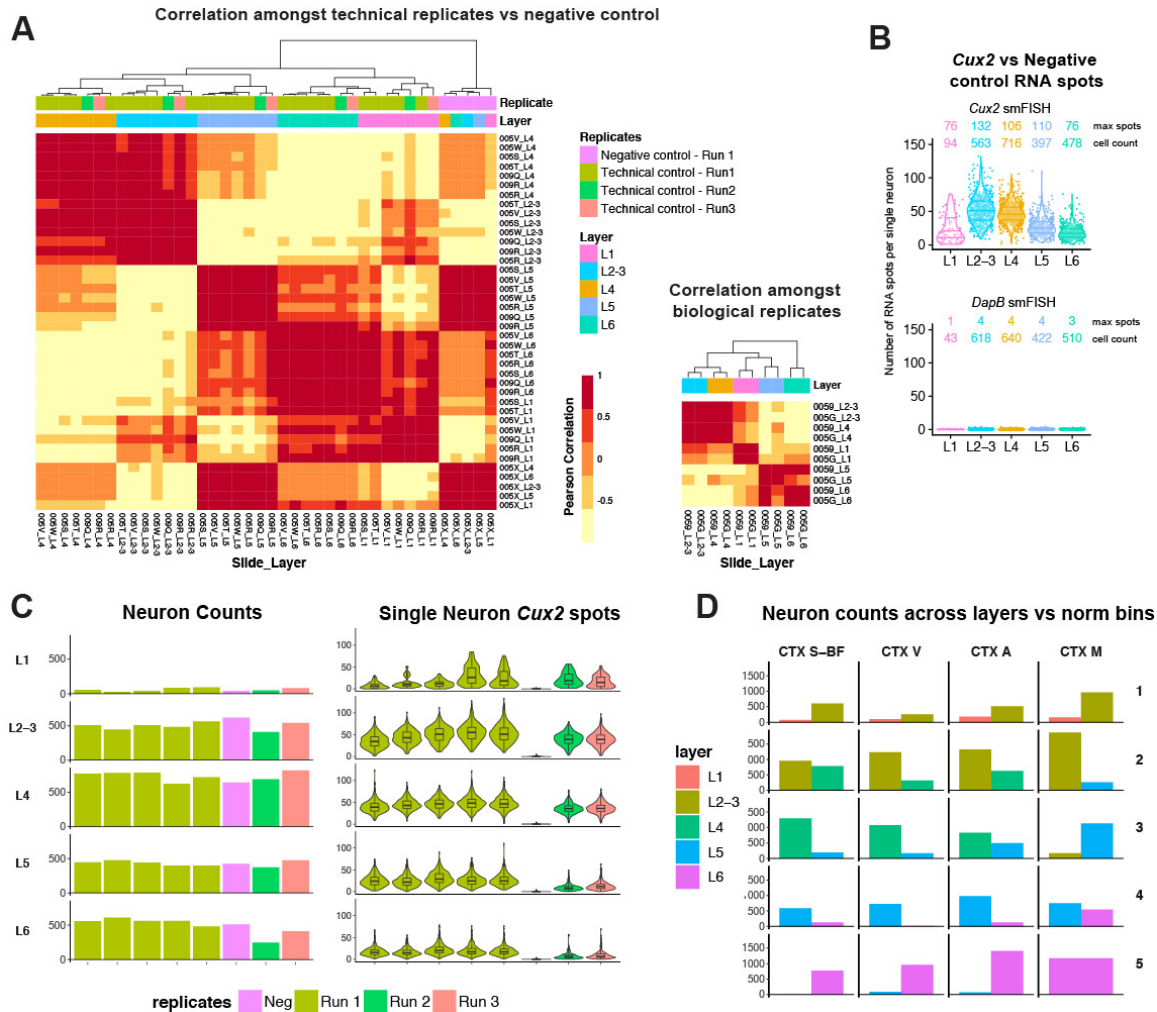

1294  
 1295  
 1296  
 1297  
 1298  
 1299  
 1300  
 1301  
 1302  
 1303  
 1304  
 1305  
 1306  
 1307  
 1308  
 1309  
 1310  
 1311  
 1312  
 1313  
 1314

**Supplementary Figure 2: Reproducibility of single neuron gene expression measurements.**

A) Neuronal gene expression measurements are highly consistent across technical and biological replicates. (Left) Heatmap showing the Pearson correlation values across expression profiles of technical replicates and the negative control. Technical replicates are consecutive P14 brain sections on different slides assayed for smFISH against 4 layer markers. Negative control was assayed for smFISH against bacterial *DapB* transcripts. To assess technical variation within a staining run, multiple replicates were assayed simultaneously on the BOND RX (Run 1). To assess batch effects, replicates were assayed on different days using different consumable reagent kits (Runs 2 and 3). To calculate the expression profiles of replicates per cortical layer, single neuron RNA spot counts for 4 layer markers (*Cux2*, *Rorb*, *Bcl11b*, *Foxp2*) are averaged and log-transformed across each layer (L1, L2-3, L4, L5, L6) in the barrel cortex. The replicate-layer expression profiles were then hierarchically clustered. As expected, cortical layers clustered across technical replicates from the same staining run as well as different batches, indicating reproducibility, while negative control layers formed a distinct cluster. (Right) Heatmap showing the Pearson correlation values across expression profiles of biological replicates. Biological replicates are barrel cortex sections from two littermate P14 animals. Average layer expression profiles were calculated as described above. As expected, cortical layers from biological replicates clustered together.

1315 **B)** Quantification of single neuron *Cux2* vs negative control *DapB* expression across cortical  
1316 layers. The background signal of RNAScope smFISH, assessed by the numbers of *DapB* spots  
1317 per cell, is 0 to 2 spots per cell. Dot plot and the violin plot show single cell data. n=2 mice  
1318 independently assayed, 3 tissue sections imaged.

1319 **C)** (Left) Quantification of neurons across cortical layers in the barrel cortex amongst replicates.  
1320 Similar number of neurons are detected based on NEUN IHC and DAPI staining across technical  
1321 and negative replicates. (Right) Quantification of single neuron *Cux2* expression across technical  
1322 and negative replicate with violin and boxplots. Negative control shows the quantification of  
1323 *DapB* expression in the same probe channel used for *Cux2* (Opal 650). The range of single cell  
1324 *Cux2* expression across upper layers is highly consistent amongst technical replicates from the  
1325 same staining run. Slightly lower expression is observed on batch replicate controls, yet the upper  
1326 layer enrichment of *Cux2* is highly similar. n=1 mouse, 3 tissue sections independently imaged.

1327 **D)** Distribution of layer neurons across normalized cortical depth bins. Cortical layers were  
1328 manually annotated across four cortical areas, then neurons were sorted into five bins across  
1329 normalized cortical depth between the pial surface and the white matter. The distributions of layer  
1330 neurons to depth bins is largely similar across different cortical areas, with the exception of motor  
1331 cortex that lacks a prominent layer 4.

1332  
1333  
1334  
1335  
1336  
1337  
1338  
1339  
1340  
1341  
1342  
1343  
1344  
1345  
1346  
1347  
1348  
1349  
1350  
1351  
1352  
1353  
1354  
1355  
1356  
1357  
1358  
1359  
1360



A

Clustering neuronal subtypes across cortical areas

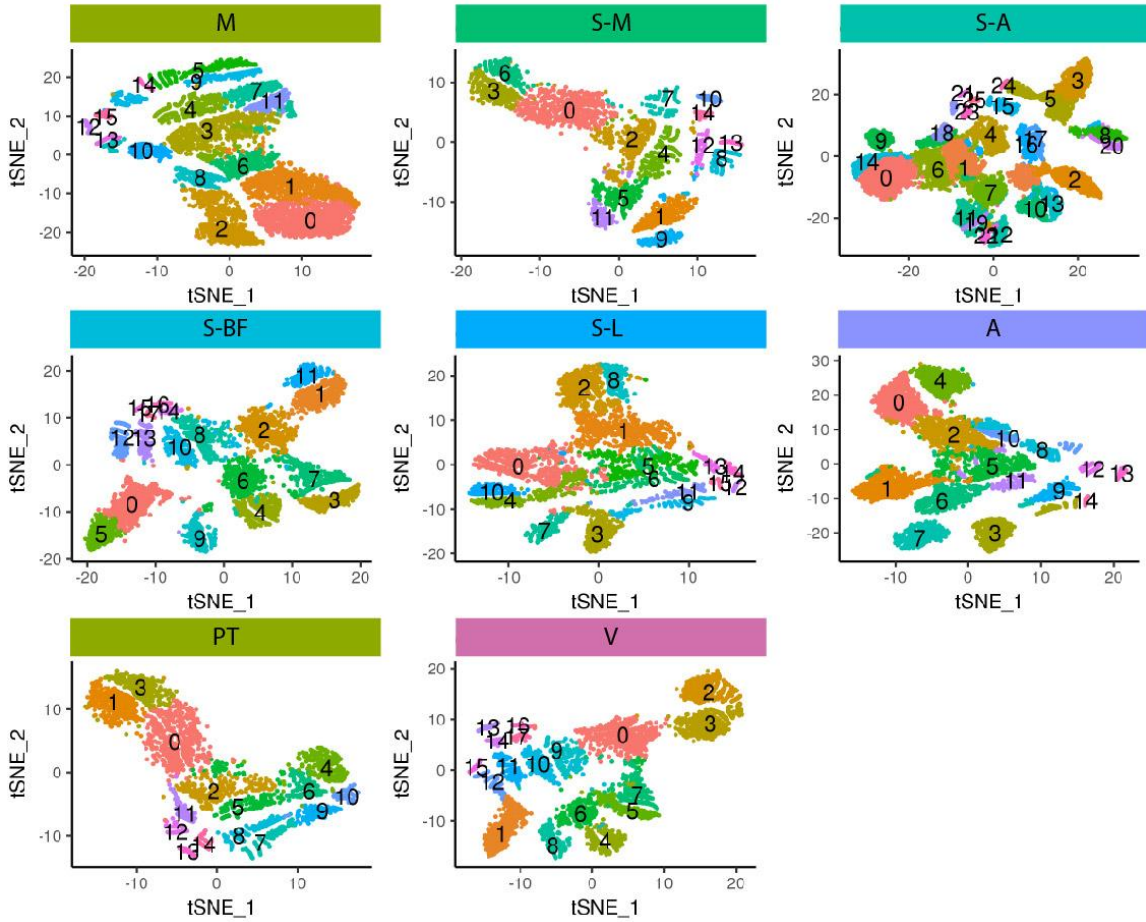

1361  
 1362  
 1363  
 1364  
 1365  
 1366  
 1367  
 1368  
 1369  
 1370  
 1371  
 1372  
 1373  
 1374  
 1375  
 1376

**Supplementary Figure 3: Clustering of single neurons from different cortical areas.**

A) To identify neuronal subtypes, clustering of single neuron gene expression was performed within each cortical area individually with 4 layer markers profiled. Single neuron tSNE coordinates were calculated from the expression profiles and tSNE plots were colored according to cluster assignments from above. See Supplementary Methods for details.

Abbreviations: M, motor, S-A, anterior- somatosensory, S-M, medial-somatosensory, S-BF, somatosensory barrel, S-L, somatosensory-lateral, PT, parietal, A, auditory, V, visual.

**A** Expression profiles of neuronal clusters across 3 cortical areas

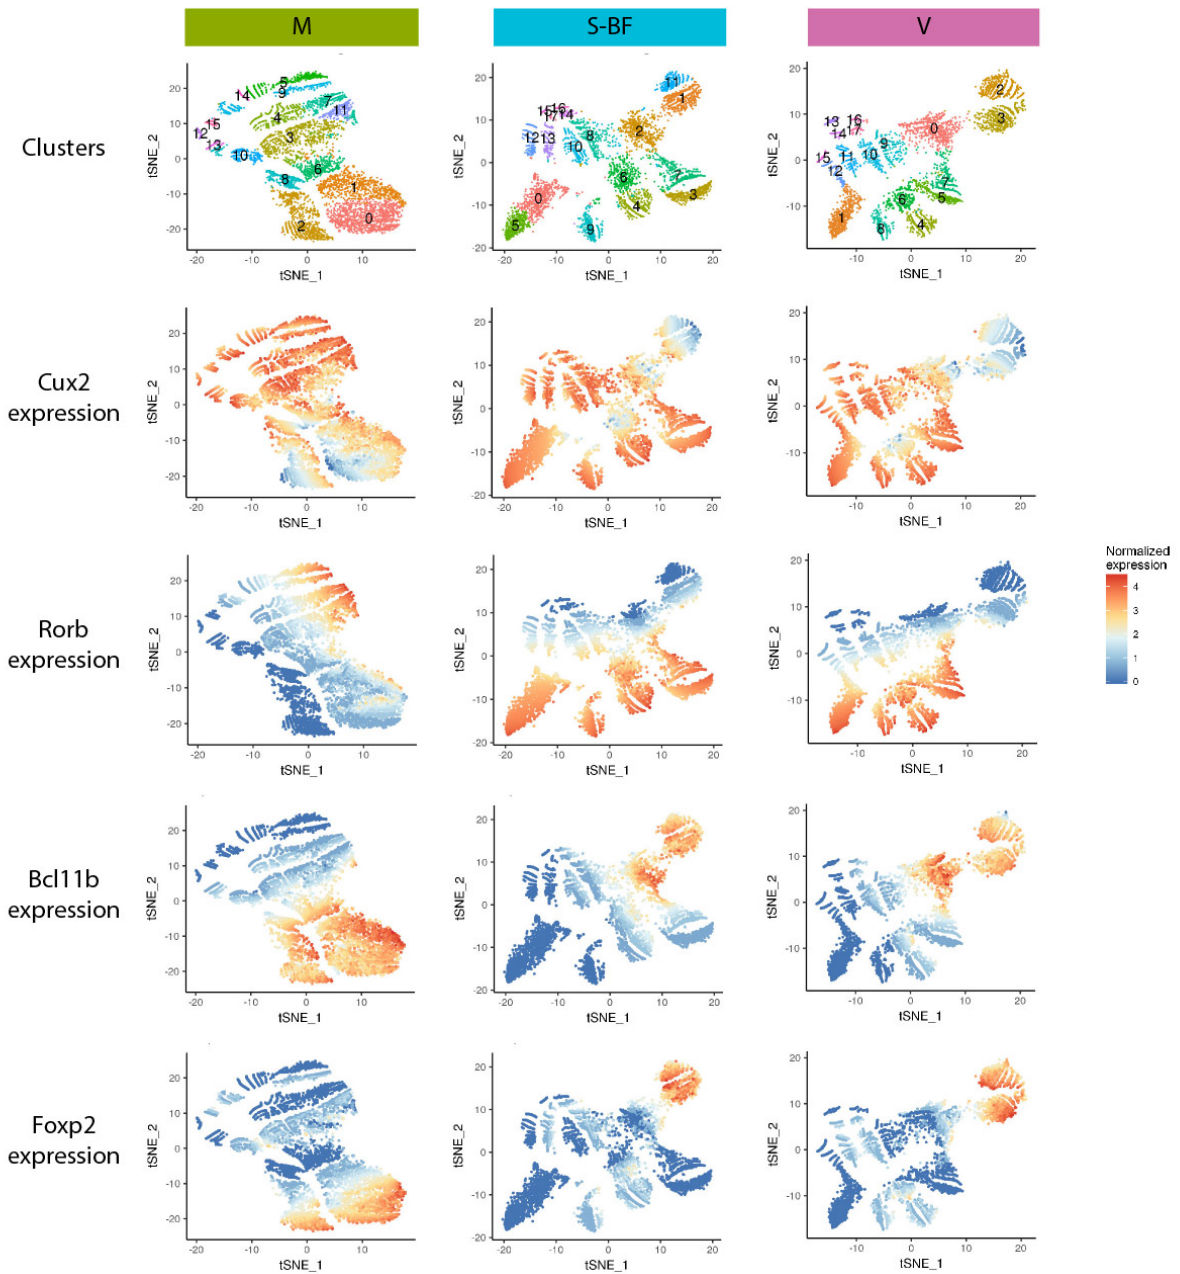

1377  
1378  
1379  
1380  
1381  
1382  
1383  
1384  
1385  
1386  
1387

**Supplementary Figure 4: Single neuron clusters are distinguished according to layer gene expression patterns.**

**A)** tSNE plots across three different cortical areas (M, motor, S-BF, somatosensory barrel, V, visual) colored according to expression values.

1388  
1389

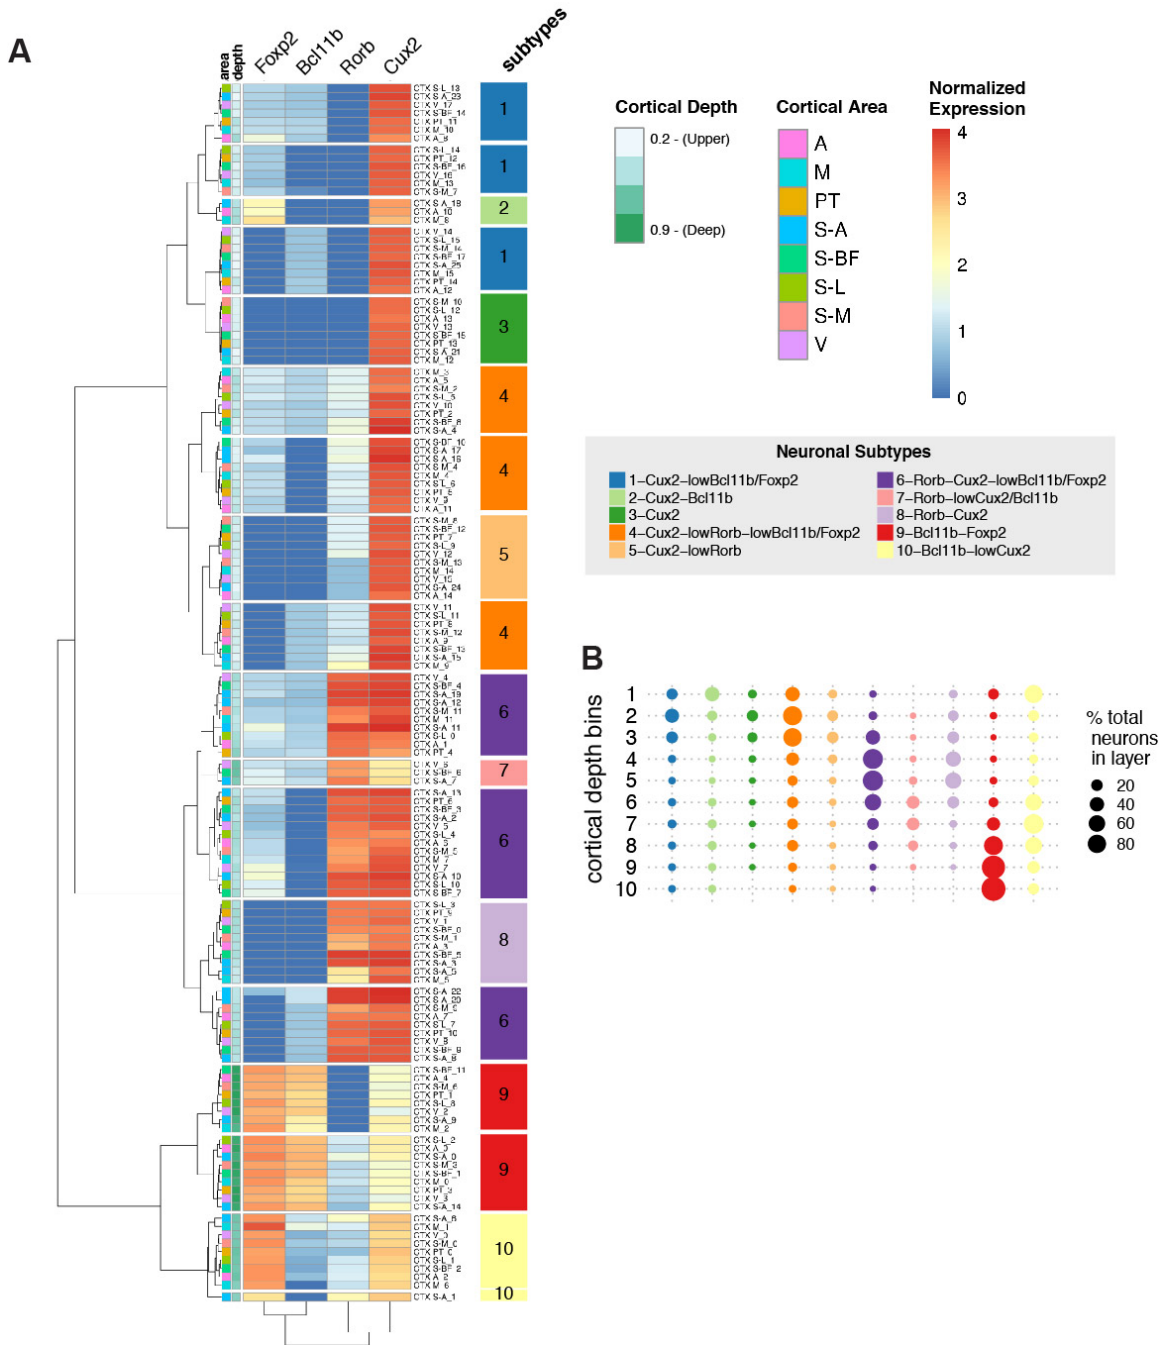

1390  
1391  
1392  
1393  
1394  
1395  
1396  
1397  
1398

**Supplementary Figure 5: Hierarchical clustering distinguishes neuronal subtypes.**

**A)** Hierarchical clustering of clusters from 8 cortical areas (Supplementary Figure 3) according to mean expression profiles of each group. The clustering yielded 18 groups that were manually annotated to 10 major subtypes based on high expression differences and spatial distribution across the cortex. **B)** Neuronal subtypes plotted across 10 cortical depth bins.

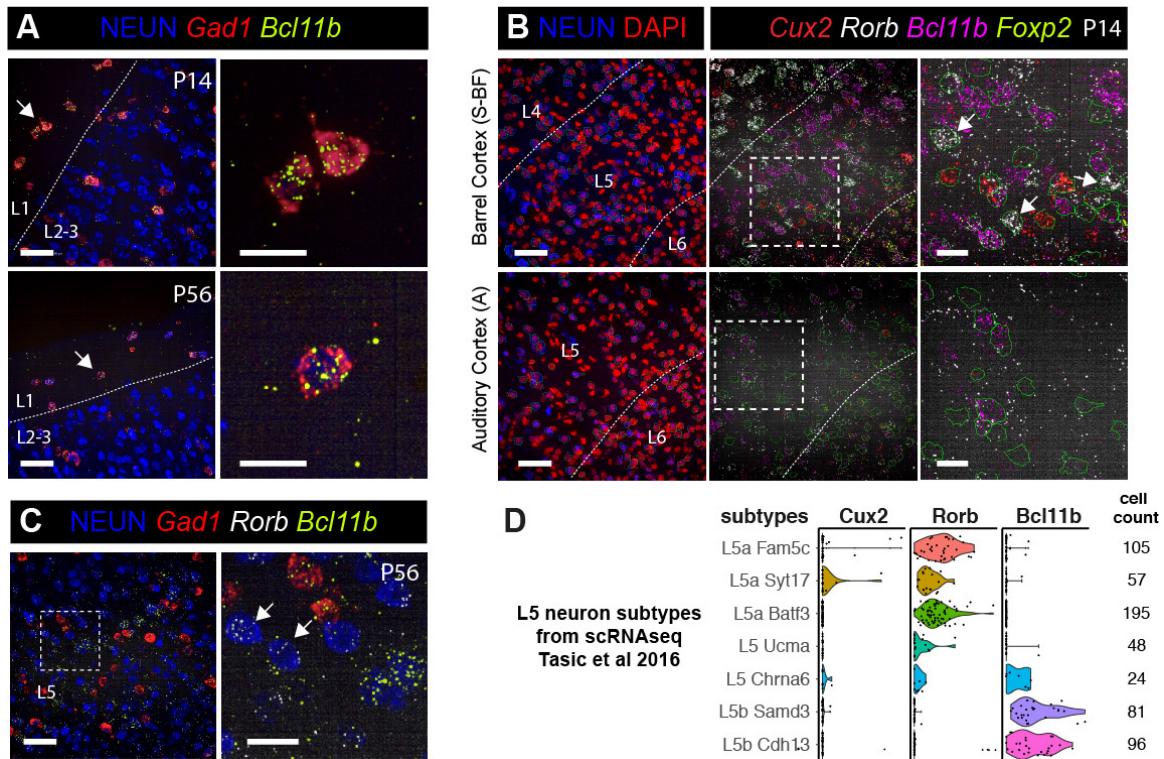

**Supplementary Figure 6: smFISH images demonstrating *Cux2<sup>mid</sup>Bcl11b<sup>mid</sup>-L1* and *Rorb<sup>high</sup>Bcl11b<sup>low</sup>-L5* neuronal populations.**

**A)** Neurons that co-express *Cux2* and *Bcl11b* (cluster #2, arrows) are observed in L1. These interneurons, based on high *Gad1* expression, are present at P14 and are maintained into adulthood at P56. Right panels show higher magnification views of indicated neurons.

**B)** Area enrichment of novel *Rorb<sup>high</sup>* L5 subpopulations. *Rorb<sup>high</sup>Cux<sup>mid</sup>Bcl11b<sup>low</sup>* neurons (cluster #7, arrows) are observed in the L5 of the somatosensory barrel cortex, but are absent from the auditory cortex at P14. The higher magnification view of L5 areas outlined in dashed boxes shown on the right panels.

**C)** *Rorb<sup>high</sup>Bcl11b<sup>low</sup>* neurons are maintained into adulthood at P56. *n*=2 mice independently assayed, 3 tissue sections imaged (A-C).

**D)** Validation of *Rorb<sup>high</sup>Bcl11b<sup>low</sup>-L5* subtypes in a published single neuron transcriptomics datasets. Dot plots of single neurons and violin plots showing the segregation of *Rorb* and *Bcl11b* expression amongst molecular subtypes of L5 neurons in the adult visual cortex identified by Tasic et al. Subtypes were named according to the nomenclature in the referenced study. Number of cells observed in each class is shown.

Scalebars: (low magnification panels) 50  $\mu$ m, (higher magnification panels) 20  $\mu$ m.

1399  
1400  
1401  
1402  
1403  
1404  
1405  
1406  
1407  
1408  
1409  
1410  
1411  
1412  
1413  
1414  
1415  
1416  
1417  
1418  
1419  
1420  
1421  
1422  
1423  
1424  
1425  
1426

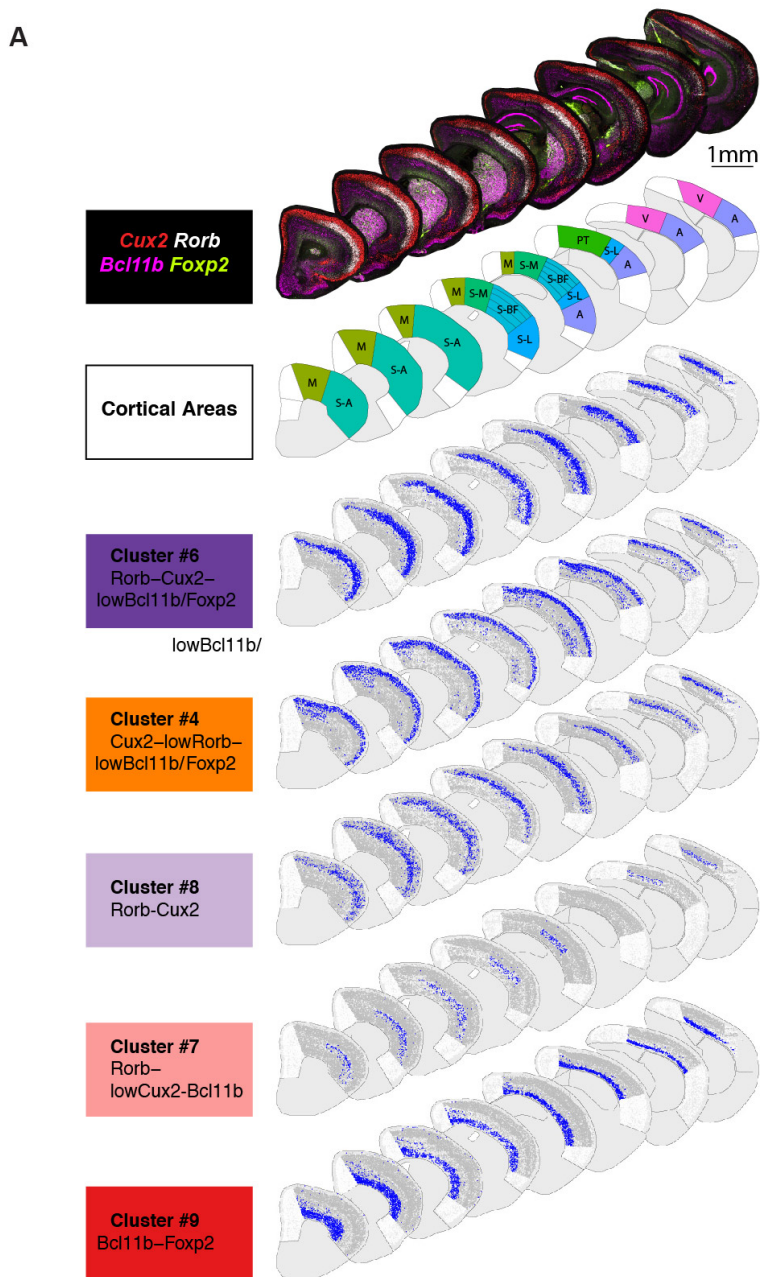

1428  
1429  
1430  
1431  
1432  
1433  
1434  
1435  
1436  
1437  
1438

**Supplementary Figure 7: Maps showing the single cell level distribution of select neuronal subtypes.**

**A)** (First row) Low magnification images of P14 hemisections from eight select anatomical levels assayed for neuronal layer marker smFISH. (Second row) Maps of broad cortical areas included in neuronal subtype analysis. (Bottom rows) Maps showing the spatial distribution of individual neuronal subtype clusters.  $n=1$  mouse, 10 sections independently imaged. Scalebar: 1 mm

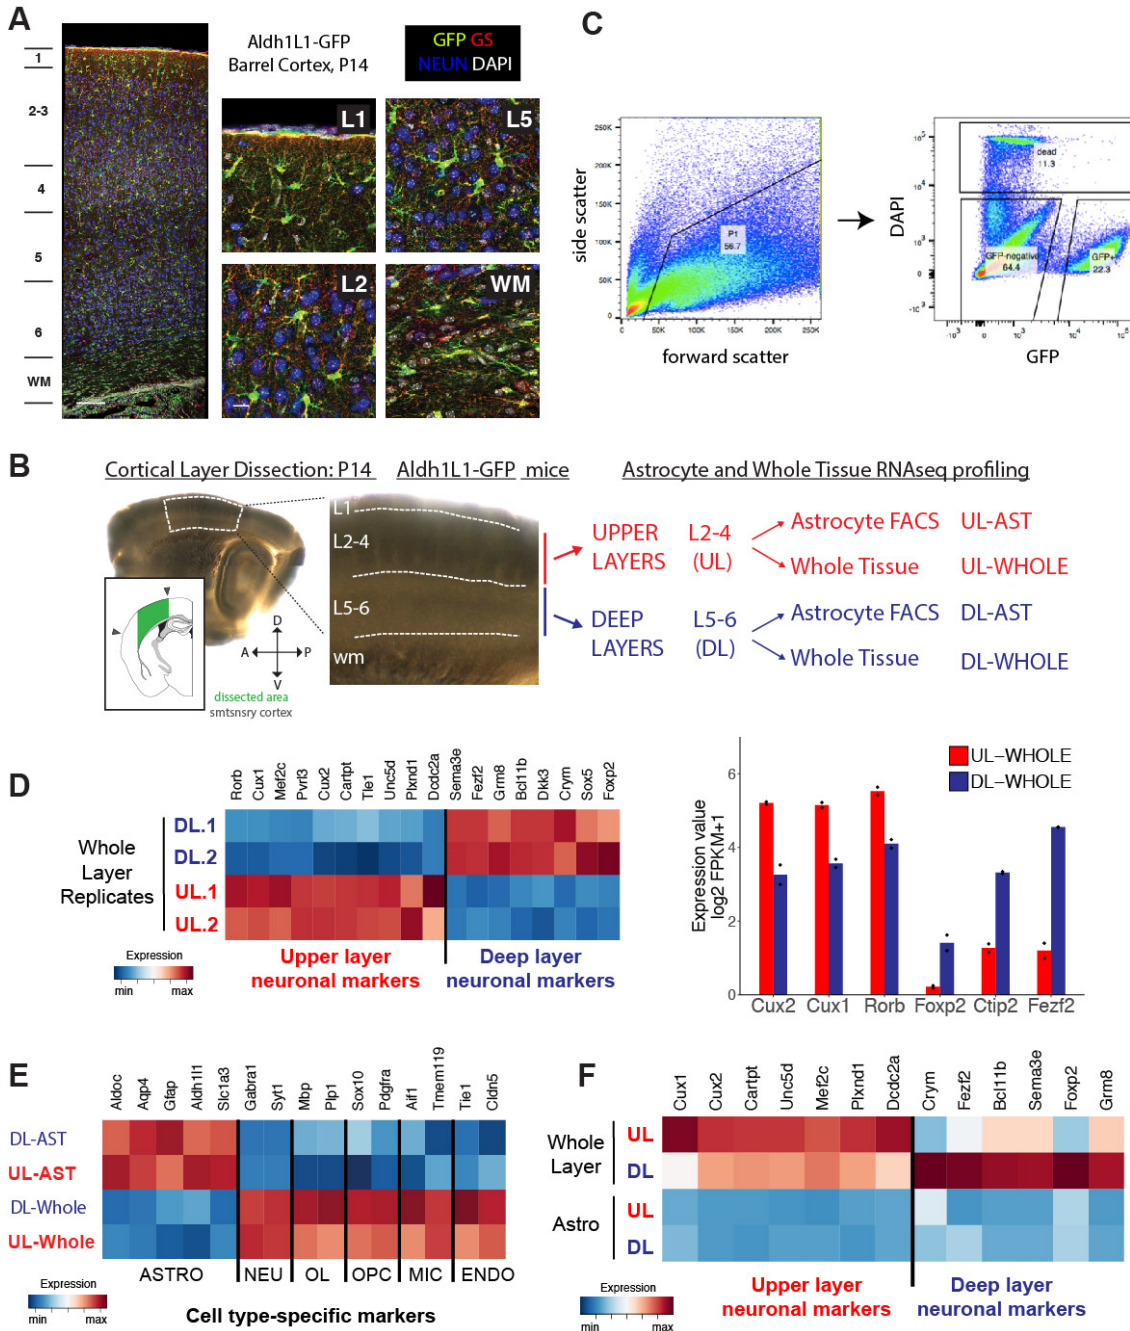

1439  
1440  
1441  
1442  
1443  
1444  
1445  
1446  
1447  
1448  
1449  
1450

**Supplementary Figure 8: Purification and RNAseq expression profiling of upper and deep layer astrocytes.**

**A)** *Aldh1L1-GFP* labeling marks astrocytes across cortical layers and excludes neurons. Confocal images of antibody staining against GFP, NEUN (neuronal marker) and Glutamine Synthetase (GS, astrocyte marker) in the barrel cortex at P14. *Aldh1L1-GFP* labeling marks astrocytes throughout cortical gray matter, white matter and L1-subpia.  $n=2$  mice independently assayed, 2 tissue sections imaged.

**B)** Schematic summarizing layer astrocyte purification and gene expression profiling. (Left) Bright-field images of a sagittal P14 mouse brain slice showing the outline of the layer microdissection in the somatosensory cortex (white dashed lines & also marked green in small

1451 diagram). L4 barrels were used as an anatomical landmark. (Right) FACS-purification and  
1452 RNAseq profiling strategy.

1453 **C)** *Aldh1L1-GFP*<sup>+</sup> astrocyte isolation by FACS using scatter gates, doublet exclusion (not  
1454 shown) and sorting for GFP<sup>+</sup> cells with dead cell exclusion by DAPI staining.

1455 **D)** RNAseq expression pattern of known layer neuron markers across whole layer tissue, shown  
1456 with an expression heatmap and bar-plots, validates the layer microdissection (n=2 biological  
1457 replicates).

1458 **E)** Expression pattern of cell type-specific markers confirms the successful purification of  
1459 astrocytes.

1460 **F)** The expression of known neuronal layer marker genes does not distinguish layer astrocytes.  
1461 Scalebars: (A, large panel) 100  $\mu\text{m}$ , (A, small panels) 25  $\mu\text{m}$ .

1462  
1463  
1464  
1465  
1466  
1467  
1468  
1469  
1470  
1471  
1472  
1473  
1474  
1475  
1476  
1477  
1478  
1479  
1480  
1481  
1482  
1483  
1484  
1485  
1486  
1487  
1488  
1489  
1490  
1491  
1492  
1493  
1494  
1495  
1496  
1497

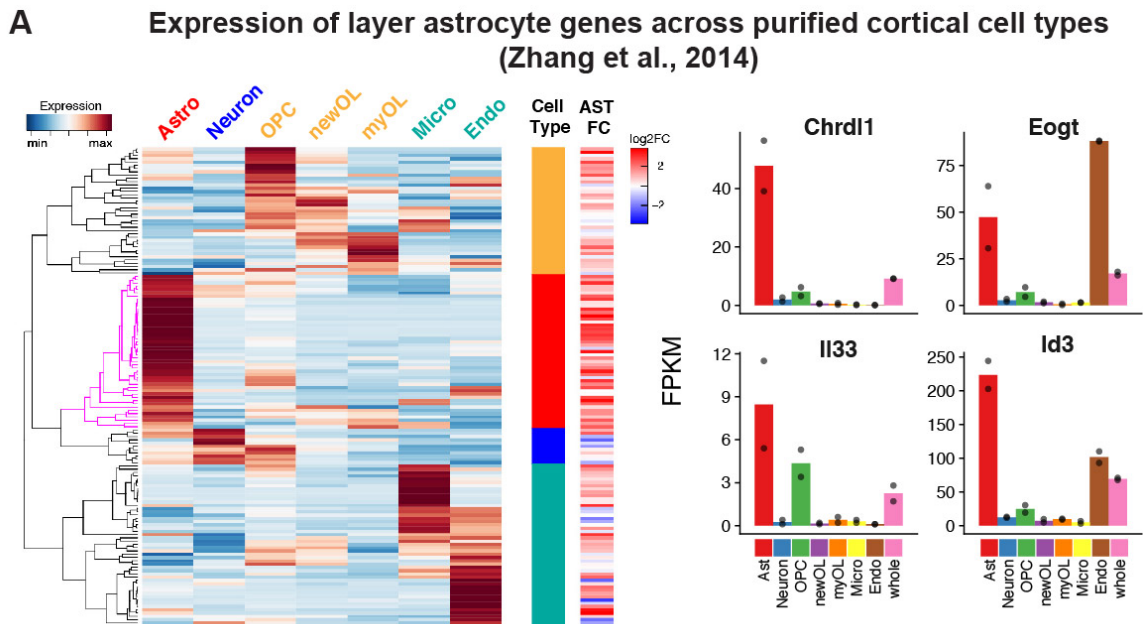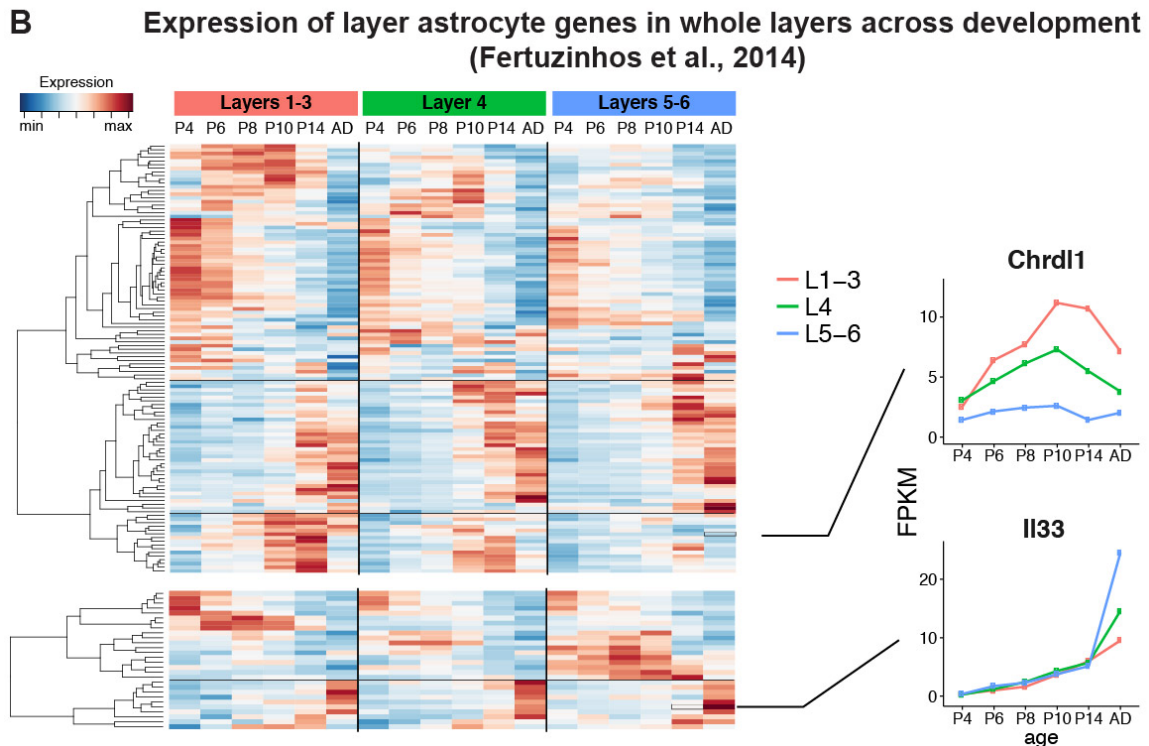

1499  
1500

**Supplementary Figure 9: Candidate layer astrocyte genes express in laminar and astrocyte-enriched manner across published cortical transcriptome dataset.**

1501  
1502  
1503  
1504  
1505  
1506  
A) The expression pattern of 159 genes differentially expressed across upper and deep layer astrocytes across purified cortical cell types. Zhang et al performed RNA-seq analysis of purified mouse cortical astrocytes, neurons, oligodendrocyte precursor cells (OPCs), newly differentiated oligodendrocytes (newOL), myelinating oligodendrocytes (myOL), microglia, and endothelial



1507 cells (Zhang et al., J Neurosci. 2014,  $n = 2$  biological replicates per cell type). (Left) Heatmap  
1508 shows that many candidate layer astrocyte genes show expression in astrocytes in Zhang et al's  
1509 dataset. Many genes have enriched expression in astrocytes, others also express in additional cell  
1510 types. (Right) Bar plots showing expression of select candidate layer astrocyte genes across cell  
1511 types. *Chrdll* expression is highly enriched in astrocytes while *Eogt* and *Id3* also show  
1512 expression on endothelial cells (validated by smFISH, data not shown).

1513 **B)** The expression of 163 candidate layer astrocyte genes across whole cortical layer tissue  
1514 throughout postnatal development and adulthood. Fertuzinhos et al performed RNA-seq analysis  
1515 manually dissected upper (L1-3), mid (L4) and deep (L5-6) cortical layers at different timepoints  
1516 during postnatal life and adulthood (Fertuzinhos et al., Cell Rep. 2014 ). (Left) Heatmap shows  
1517 that many candidate layer astrocyte genes show laminar and developmentally regulated gene  
1518 expression in Fertuzinhos et al's dataset. Top heatmap shows upper layer astrocyte enriched  
1519 genes while the bottom heatmap shows deep layer astrocyte enriched genes. Many genes are  
1520 upregulated during early postnatal life, consistent with the commencement and progression of  
1521 cortical astrogenesis after birth (24) (clusters marked in magenta on the dendrogram). (Right)  
1522 Most layer astrocyte candidate genes show temporally regulated expression throughout postnatal  
1523 life. *Chrdll* expression peaks during the second postnatal week yet persists into adulthood. *Il33*  
1524 expression increases into adulthood.

1525  
1526  
1527  
1528  
1529  
1530  
1531  
1532  
1533  
1534  
1535  
1536  
1537  
1538  
1539  
1540  
1541  
1542  
1543  
1544  
1545  
1546  
1547  
1548  
1549  
1550  
1551  
1552  
1553  
1554

1555  
1556  
1557  
1558  
1559  
1560  
1561

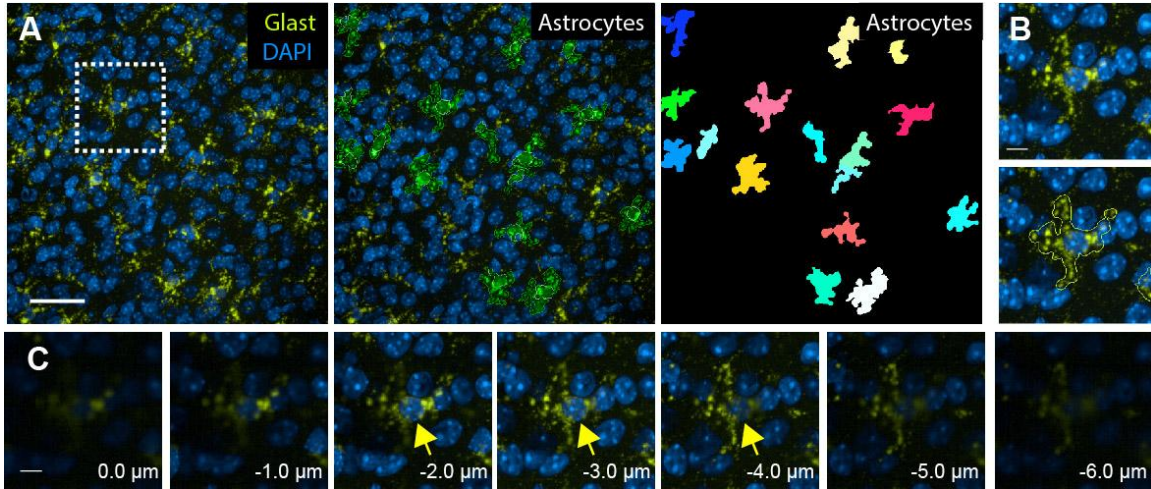

1562  
1563

**Supplementary Figure 10: Identification of cortical astrocytes with *Glact* smFISH.**

1564  
1565 A) (Left) Maximum z-projection image showing astrocytes in the P14 barrel cortex upper layers.  
1566 (Middle) Segmentation of single astrocytes, outlined are astrocyte cell areas (green) and nuclei  
1567 (white). (Right) Segmentation masks of individual astrocytes.  
1568 B) Higher magnification image of an astrocyte indicated with dashed box in A. Bottom panel also  
1569 shows the outline of the astrocyte cell area in dashed lines.  
1570 C) Individual 40X z-planes throughout the same astrocyte. The arrow indicates the astrocyte  
1571 nuclei marked by Glact and DAPI. For astrocyte segmentation, the z-stack is collapsed into a  
1572 single plane via a maximum intensity projection.  $n=14$  mice assayed across 4 independent  
1573 batches, 5-10 tissue sections imaged.  
1574 Scalebars: (A) 50  $\mu\text{m}$ , (B,C) 10  $\mu\text{m}$

1575  
1576  
1577  
1578  
1579  
1580  
1581  
1582  
1583  
1584  
1585  
1586  
1587  
1588  
1589

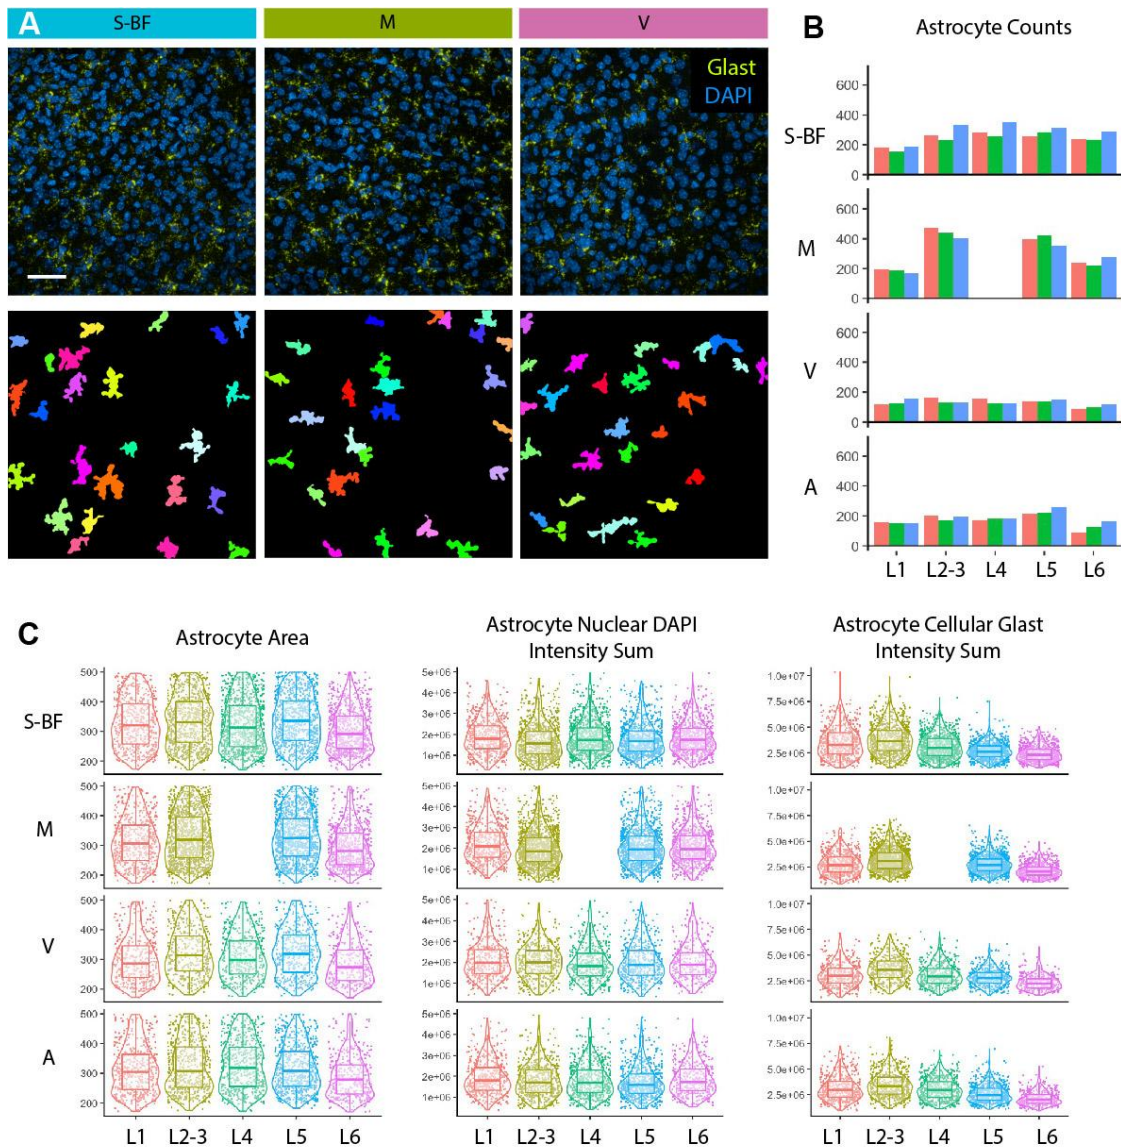

1590  
1591  
1592  
1593  
1594  
1595  
1596  
1597  
1598  
1599  
1600  
1601  
1602  
1603  
1604  
1605  
1606

**Supplementary Figure 11: Identification of astrocytes across different cortical layers.**

**A)** Images (top) and segmentation masks (bottom) of astrocytes from barrel, motor and visual cortex. Midcortical layers (L4-5) are shown.

**B)** Astrocyte cell counts across cortical layers and areas are consistent across three technical replicates (different colors).

**C)** Astrocyte segmentation performs consistently across cortical areas. Violin, box and dot plots showing the cellular features of single astrocytes measured across four cortical areas. Deep layer astrocytes are slightly smaller and show lower expression of Glast than upper layer astrocytes. Number of astrocytes plotted across cortical astrocytes: A: 2628, M: 3777, S-BF: 3878 and V: 1968.  $n=1$  mouse, 5-10 tissue sections independently imaged.

Scalebar: (A) 50  $\mu$ m

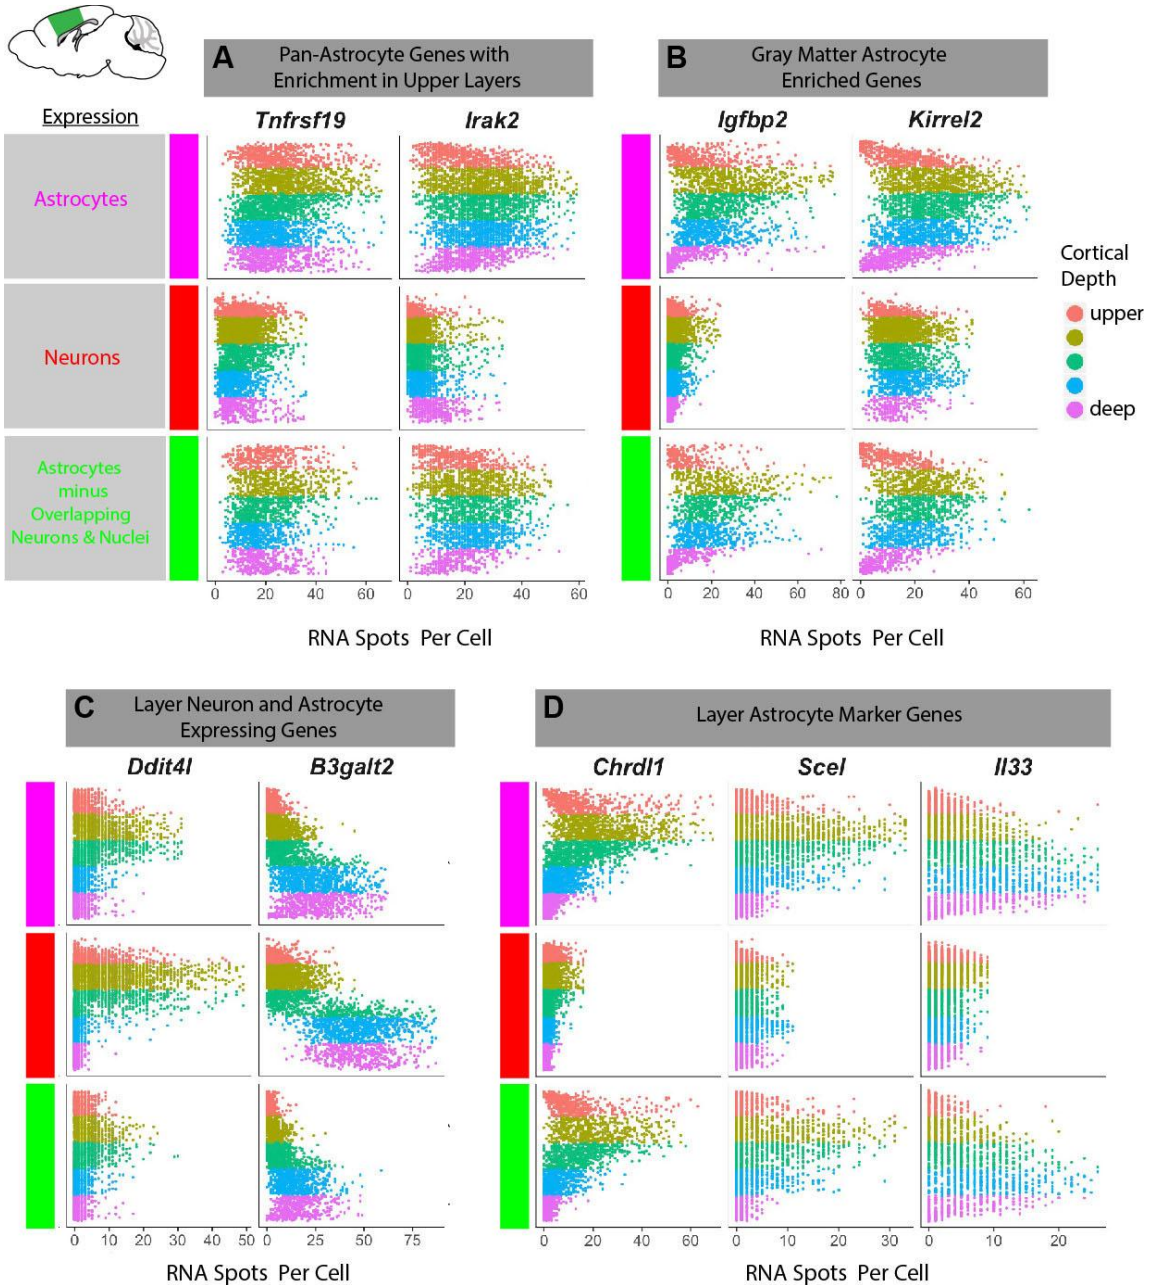

1607  
 1608  
 1609  
 1610  
 1611  
 1612  
 1613  
 1614  
 1615  
 1616  
 1617

**Supplementary Figure 12: Screening and selection of top layer astrocyte markers.**

Quantification of single astrocyte, neuron and filtered astrocyte (i.e. removal of z-overlapping neurons and non-astrocyte nuclei) in situ expression of candidate layer astrocyte genes identifies several spatial and cell type-specific expression patterns. Screened genes show pan-astrocyte (A), gray matter astrocyte (B), astrocyte and neuron (C), and layer astrocyte enriched (D) expression patterns.  $n=2$  mice assayed independently, 3 tissue sections imaged per replicate.

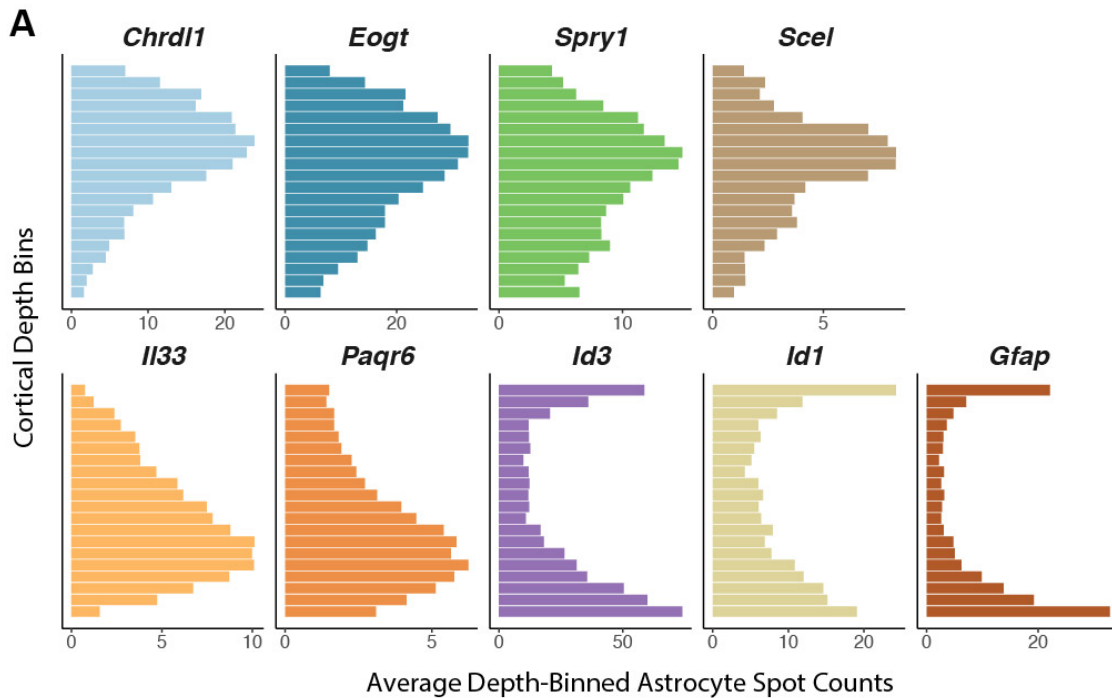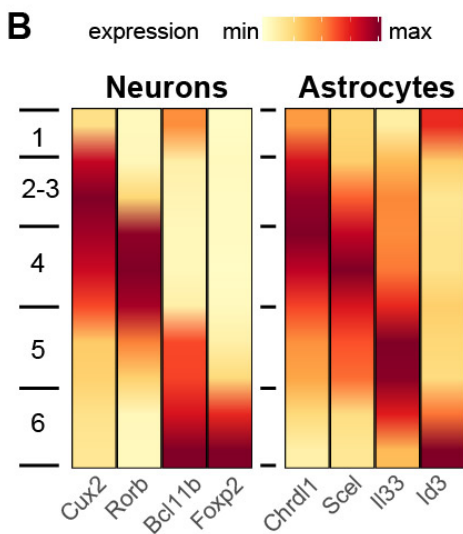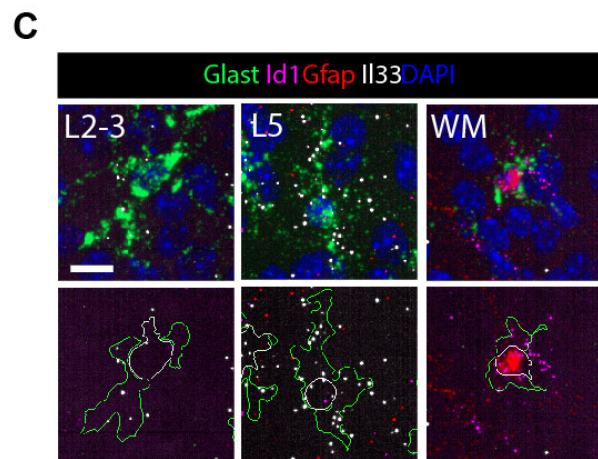

1618  
1619  
1620  
1621  
1622  
1623  
1624  
1625  
1626  
1627  
1628  
1629  
1630  
1631

**Supplementary Figure 13: Astrocyte layer gene expression diverges from neuronal laminae.**

**A)** Quantification of astrocyte layer marker expression across cortical depth. Plots show the single astrocyte expression averaged across ten cortical depth bins in the P14 somatosensory cortex ( $n=2$  pooled biological replicates).

**B)** Interpolated tile expression plots comparing neuron vs astrocyte layer marker expression across cortical depth in the P14 barrel cortex ( $n=3$  pooled tissue sections across the somatosensory cortex from one biological replicate). Astrocyte layer expression domains diverge from sharply refined neuronal laminae. A Chi2-test comparing the expression of astrocyte to neuron layer markers cortical depth supported this conclusion ( $p\text{-value} < 1e-16$ ).

**C)** *Il33* expression is enriched in L5 astrocytes but absent from white matter astrocytes at P14.  $n=2$  mice independently assayed, 3 tissue sections imaged.

Scalebar: (C) 10  $\mu$ m

## Single Astrocyte RNA Spot Quantification

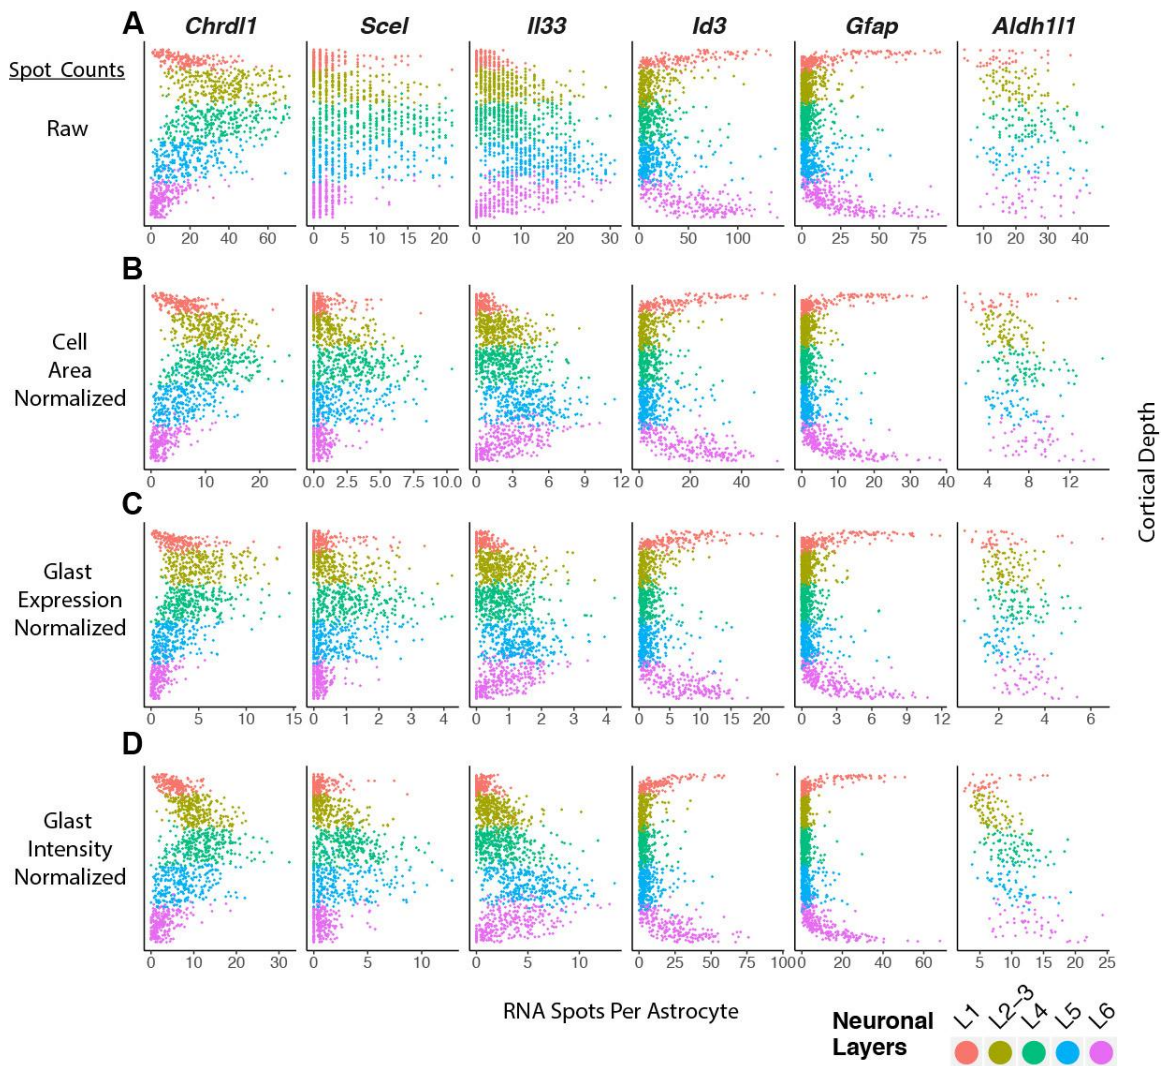

1632  
1633  
1634  
1635  
1636  
1637  
1638  
1639  
1640  
1641  
1642  
1643  
1644  
1645

**Supplementary Figure 14: The observed astrocyte layer gene expression patterns are not artifacts of cell size or *Glast* expression level differences.**

Quantification of single astrocyte expression across cortical depth in the P14 barrel cortex (n=3 pooled tissue sections from one biological replicate). The expression of identified layer astrocyte markers, the white matter astrocyte marker *Gfap* and the pan-astrocyte marker *Aldh111* are plotted as single cell RNA spot counts that are (A) raw, or normalized to (B) astrocyte area, (C) single cell *Glast* spot counts, and (D) single cell *Glast* signal intensity. n=2 mice independently assayed, 3 tissue sections imaged.

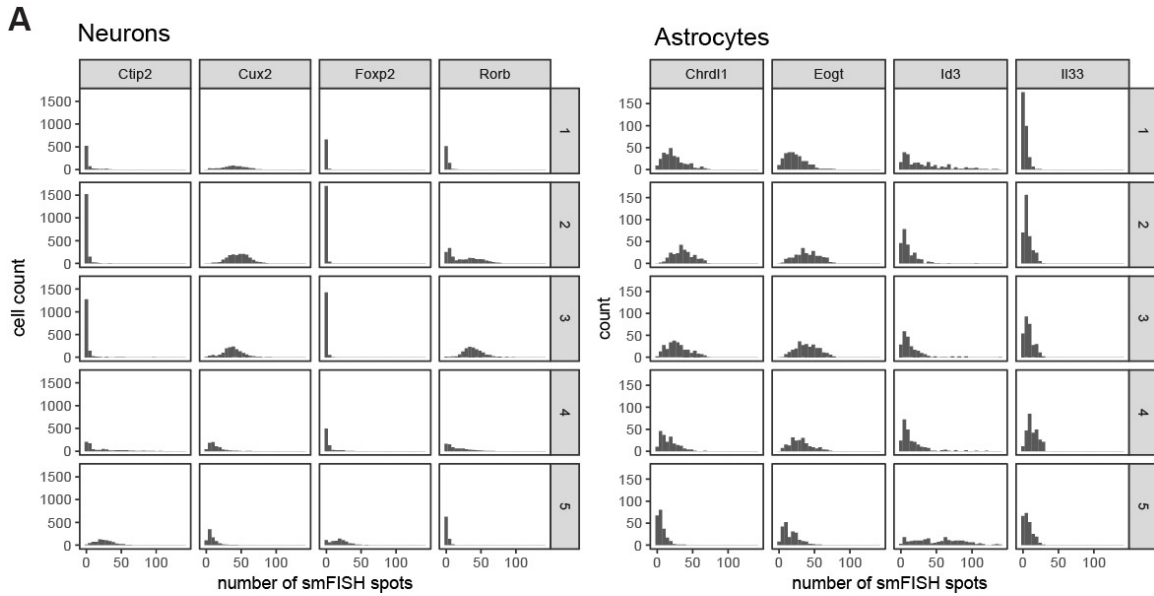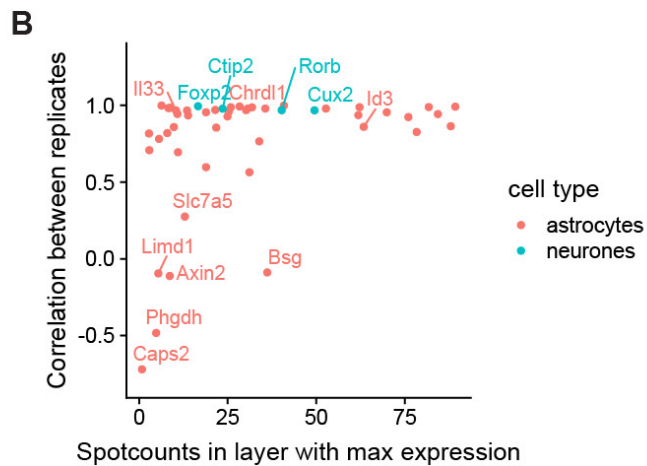

1646  
1647  
1648  
1649  
1650  
1651  
1652  
1653  
1654  
1655  
1656  
1657  
1658  
1659  
1660  
1661  
1662

**Supplementary Figure 15: Reproducibility of astrocyte expression patterns across gene expression levels.**

**A)** The best neuronal (left) and astrocyte (right) cortical layer markers have similar expression level in bins with highest expression. Comparison of expression level (X-axis) histogram counts (Y-axis) of neuronal and astrocyte cortical layer markers (columns) across 5 spatial bins (rows).

**B)** Spatial profiles of most astrocyte and neuron layer markers (color) correlate well between biological replicates (Y-axis) regardless of the expression level (X-axis, expression level in bins where genes are maximally expressed). Selected best markers as well as the genes with the least reproducible patterns are marked. Multiple tissue sections across the somatosensory cortex were assayed from two P14 mice for the analysis.

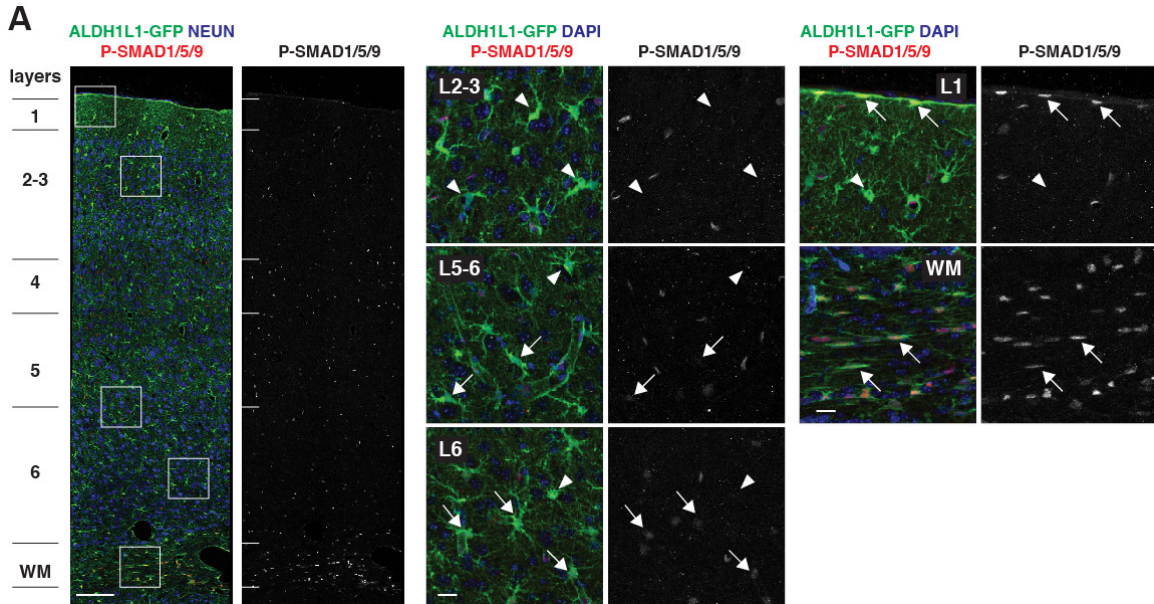

1663

1664

1665 **Supplementary Figure 16: Layer 6 astrocyte enriched *Id3* expression is consistent**  
 1666 **with activated BMP signaling in this population assessed pSmad**  
 1667 **immunohistochemistry.**

1668 A) L6, WM and L1-subpia astrocytes show higher levels of phosphorylated Smad  
 1669 (pSmad) immunostaining that indicates *Id* protein activity. This pattern is consistent with  
 1670 the expression pattern of *Id3* mRNA detected with LaSTmap smFISH. Images from the  
 1671 P14 somatosensory cortex of the *Aldh1L1*-GFP astrocyte reported mice are shown.  
 1672 Arrows indicate astrocytes with high pSmad, while arrowheads indicate astrocytes with  
 1673 low pSmad staining.  $n=2$  mice assayed in one experiment, 3 tissue sections imaged. b  
 1674 Scalebar: (large panels) 100  $\mu\text{m}$ , (small panels) 25  $\mu\text{m}$ .

1675

1676

1677

1678

1679

1680

1681

1682

1683



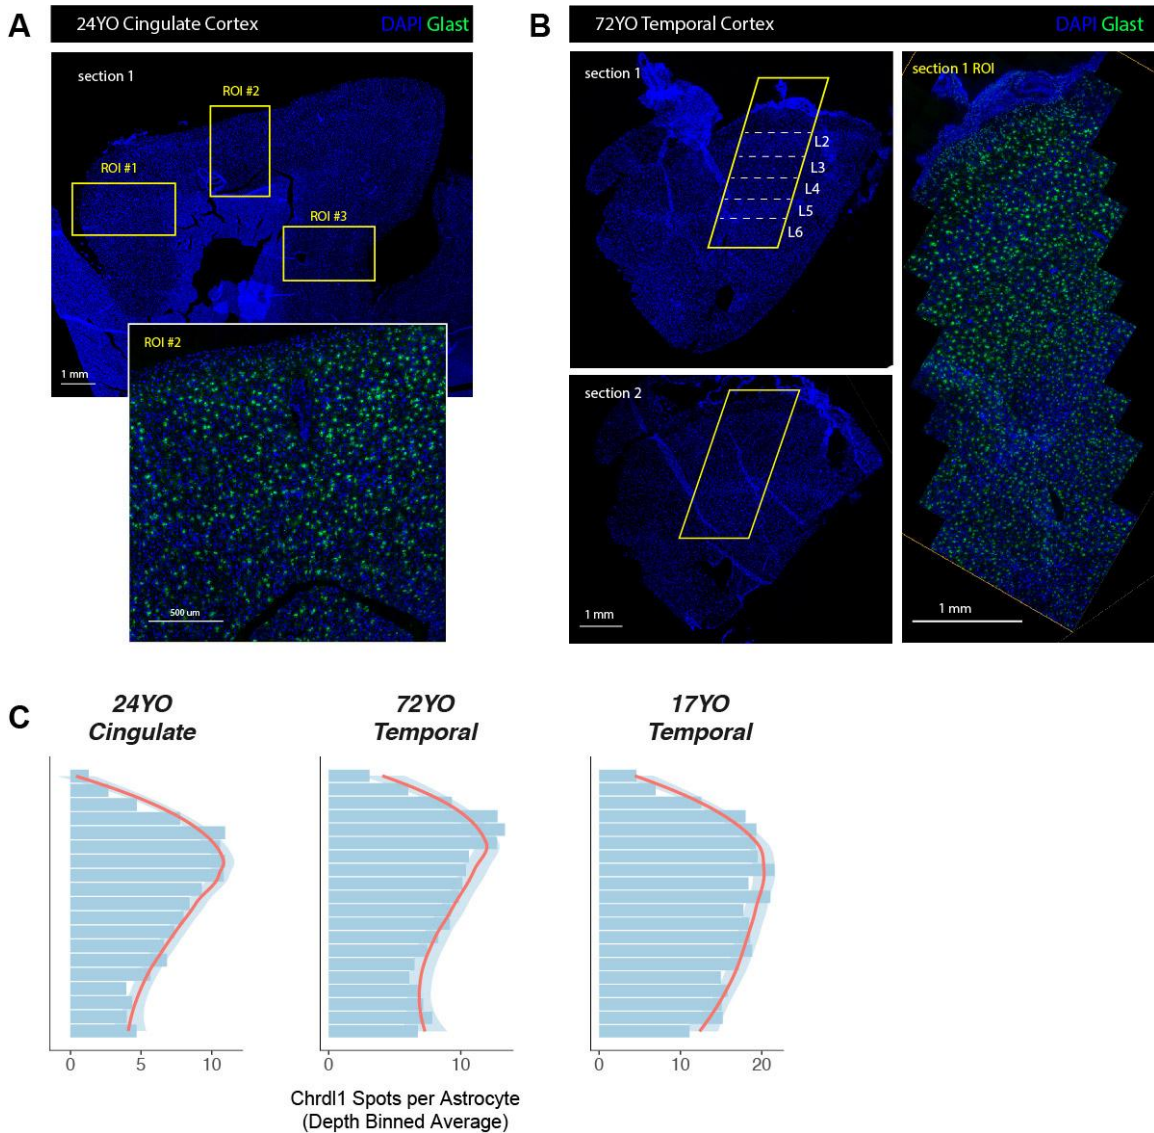

1684  
1685  
1686  
1687  
1688  
1689  
1690  
1691  
1692  
1693  
1694  
1695  
1696  
1697  
1698  
1699  
1700  
1701

**Supplementary Figure 17: *Chrd11* expression is enriched in upper layer astrocytes in the adult human cortex.**

**A)** Astrocytes in the 24 year old cingulate cortex. Low magnification images show DAPI staining of a section through the cingulate cortex (top) and Glast smFISH of the ROI #2 (bottom). Boxed regions of interest were imaged at 40X to quantify layer astrocyte expression of *Chrd11*.

**B)** Astrocytes in the 72 year old temporal cortex. Low magnification images show DAPI staining of two sections through the temporal cortex (left) and Glast smFISH of the ROI on the first section (right). Boxed regions of interest were imaged at 40X to quantify layer astrocyte expression of *Chrd11*.

**C)** Quantification of depth binned average single astrocyte expression of *Chrd11* across the 24YO cingulate, 72YO temporal and 17YO temporal cortex samples. The three samples were assayed and imaged independently.

Scalebars: (DAPI) 1 mm, (DAPI-Glast) 0.5 mm

1702  
 1703  
 1704  
 1705  
 1706  
 1707  
 1708  
 1709  
 1710  
 1711  
 1712  
 1713  
 1714  
 1715  
 1716  
 1717  
 1718  
 1719  
 1720  
 1721  
 1722  
 1723  
 1724  
 1725  
 1726  
 1727  
 1728  
 1729  
 1730  
 1731  
 1732  
 1733  
 1734  
 1735  
 1736  
 1737  
 1738  
 1739  
 1740  
 1741  
 1742  
 1743  
 1744  
 1745  
 1746  
 1747  
 1748

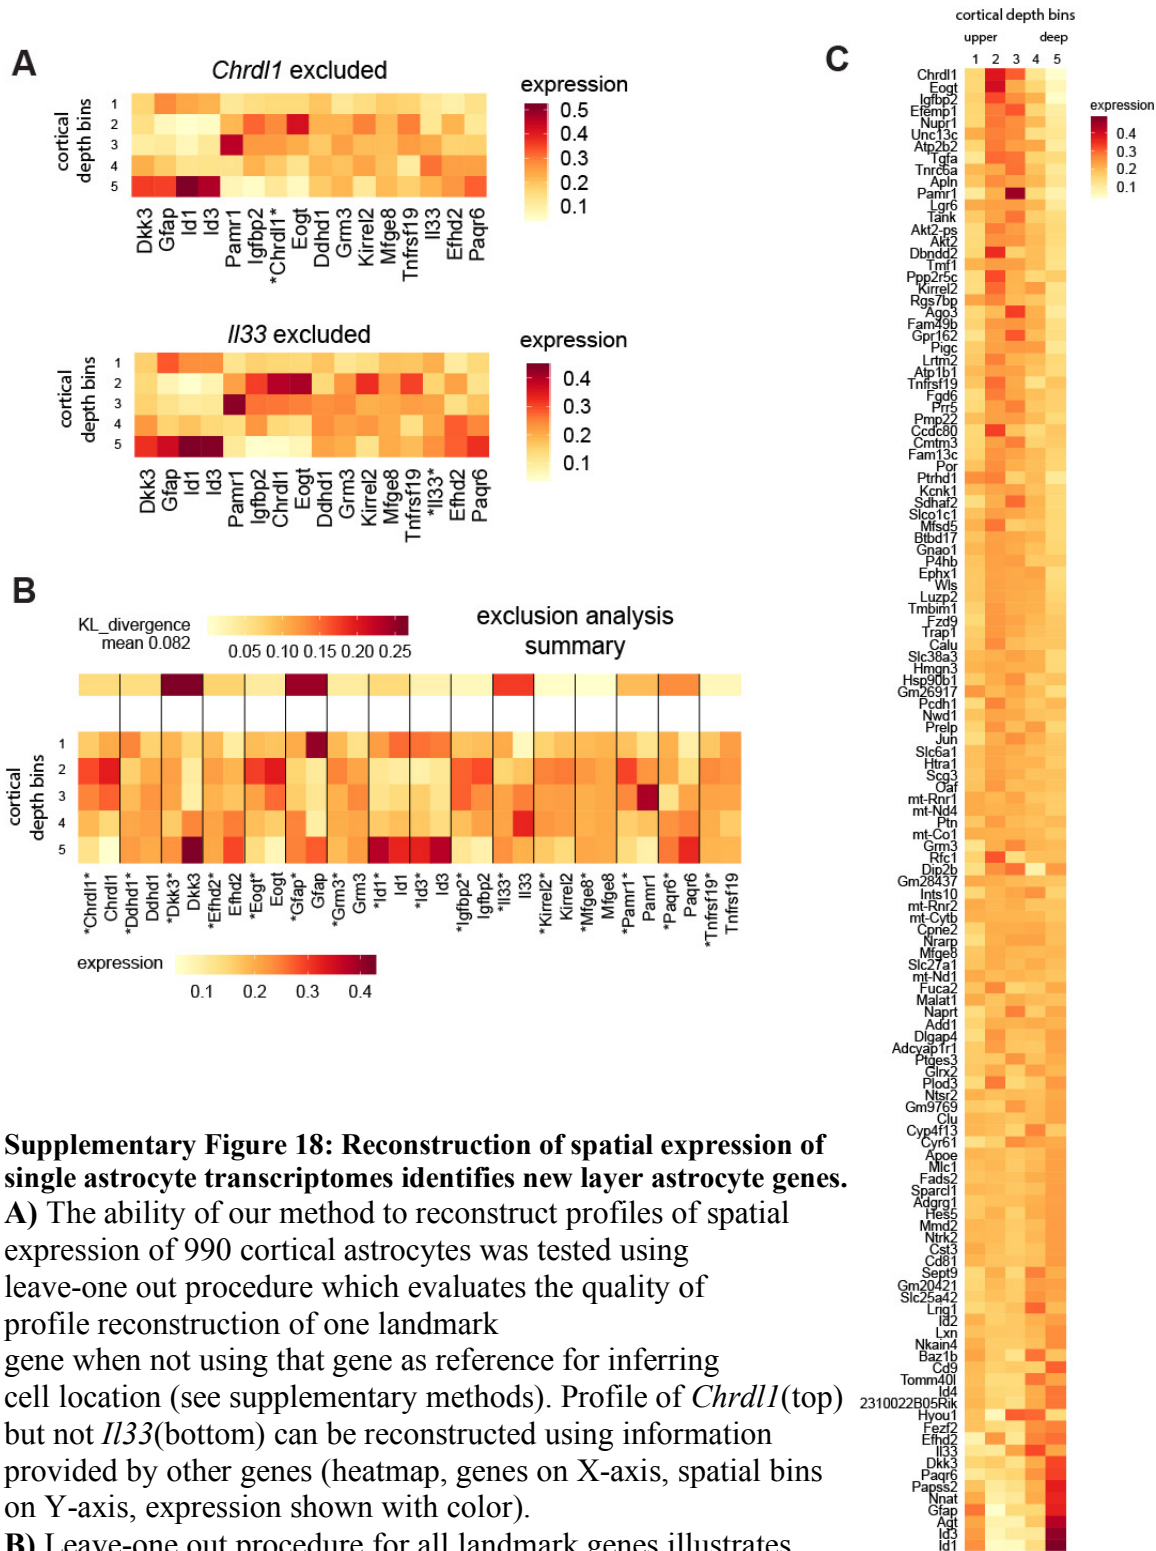

**Supplementary Figure 18: Reconstruction of spatial expression of single astrocyte transcriptomes identifies new layer astrocyte genes.**

**A)** The ability of our method to reconstruct profiles of spatial expression of 990 cortical astrocytes was tested using leave-one out procedure which evaluates the quality of profile reconstruction of one landmark gene when not using that gene as reference for inferring cell location (see supplementary methods). Profile of *Chrdl1*(top) but not *Il33*(bottom) can be reconstructed using information provided by other genes (heatmap, genes on X-axis, spatial bins on Y-axis, expression shown with color).

**B)** Leave-one out procedure for all landmark genes illustrates which genes have profiles that are easily reconstructed (marked with asterisk) according to visual inspection, and relative entropy (top bar) compared to observed profile.

**C)** Expression profiles (color) of 125 significantly layer-restricted genes (Y-axis) across 5 spatial bins (X-axis).

1749

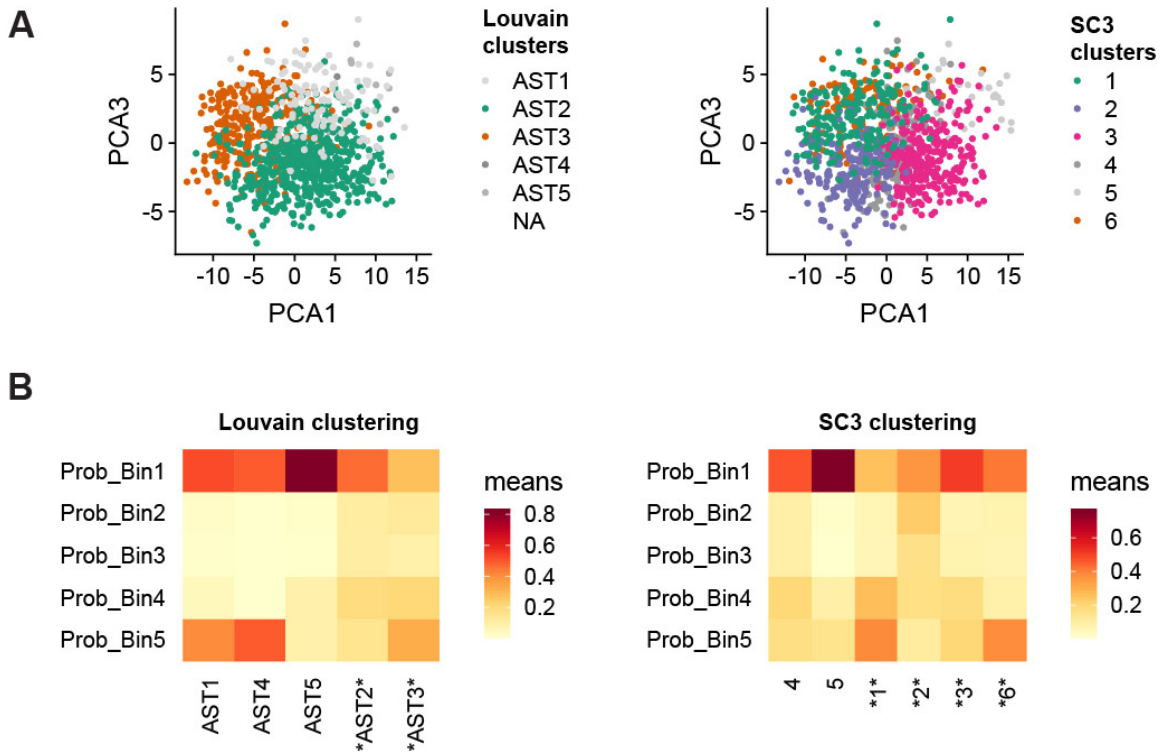

1750  
1751  
1752  
1753  
1754  
1755  
1756  
1757  
1758  
1759  
1760  
1761  
1762  
1763  
1764  
1765  
1766  
1767  
1768  
1769  
1770  
1771  
1772

**Supplementary Figure 19: scRNA-seq subtypes identified with unsupervised clustering do not show distinct pattern of layer locations**

**A)** Louvain (left) and SC3 (right) unsupervised clustering methods identify cortical astrocyte subtypes (color), shown in Principal Component dimensions (PC1 – X-axis, PC2 – Y-axis) from 990 profiled cells. Louvain clustering is obtained from Batiuk et al (23) where cluster AST2 and AST3 are cortical astrocytes. SC3 clustering was performed cortical subset of the data using default parameters. The number of clusters was chosen based on p-value for the clustering and presence of coherent markers for most clusters. Clusters 4 and 5 were considered as poor quality due to the lack of markers and that these are hypothalamic clusters with few cells in the cortex.

**B)** Clusters have overall similar location and cells from most clusters are located in bin 1 and 5 (corresponding to layer 1 and 6). Probability of cell assignment (color) to spatial bins (Y-axis) average across cells from the same cluster (X-axis). High-quality Louvain (left) and SC3 (right) clusters are marked with asterisk. SC3 cluster 1 and 2 have higher location probability in middle layers than AST2 and 3, however, both cells from both Louvain and SC3 clusters do not follow clear layer pattern.

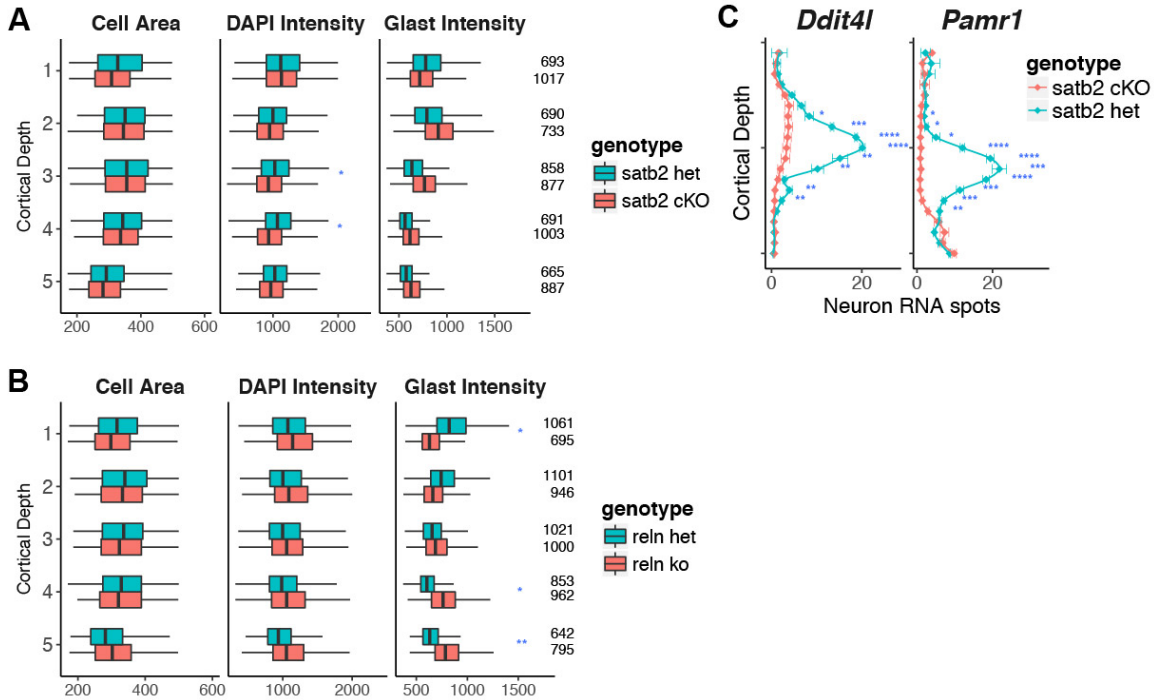

1773  
1774  
1775  
1776  
1777  
1778  
1779  
1780  
1781  
1782  
1783  
1784  
1785  
1786  
1787  
1788  
1789  
1790  
1791  
1792  
1793  
1794  
1795  
1796  
1797  
1798  
1799  
1800  
1801

**Supplementary Figure 20: Astrocyte cellular phenotypes in neuronal layer switch experiments and loss of L4 neuron gene expression in *Satb2* cKO.**

**A)** Boxplots comparing astrocyte area, DAPI and Glast intensity between *Satb2* cKO and littermate controls in the P14 barrel cortex. No significant change is observed in these astrocyte features upon *Satb2* cKO. Cell counts per genotype per cortical depth bin are shown on the right (n=3 pooled biological replicates per genotype).

**B)** Boxplots comparing astrocyte area, DAPI and Glast intensity between *Reeler* and littermate controls in the P14 barrel cortex. In *Reeler*, the difference in *Glust* expression between superficial and deep astrocytes is inverted, consistent with the inversion of astrocyte layers based on marker gene expression. Cell counts per genotype per cortical depth bin are shown on the right (n=3 pooled biological replicates per genotype).

**C)** Quantification of cortical depth binned neuronal layer marker expression in cKO vs control (n=3 pooled biological replicates per genotype). *Satb2* cKO shows loss of L4 neuron gene expression based on additional L4 markers, *Ddit4l* and *Pamr1*.

Two-tailed student's t-test was used. Data represent mean ± s.d. \*P < 0.05, \*\*P < 0.01, \*\*\*P < 0.001.

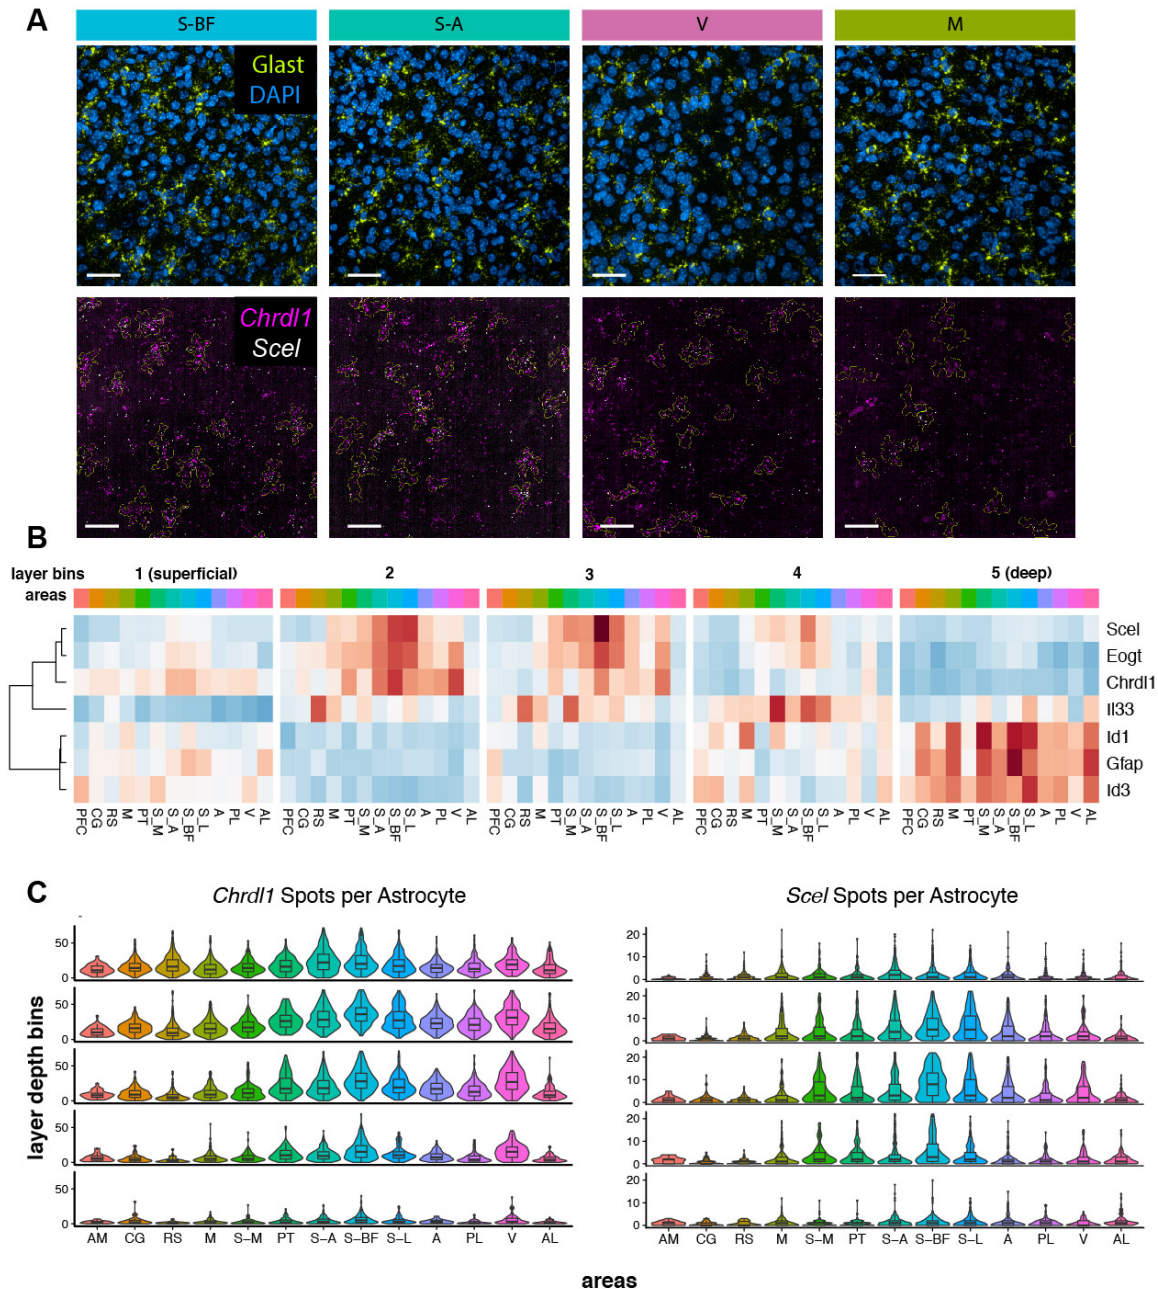

1802  
 1803  
 1804  
 1805  
 1806  
 1807  
 1808  
 1809  
 1810  
 1811  
 1812  
 1813  
 1814

**Supplementary Figure 21: Astrocyte layer gene expression varies across cortical areas.**

**A)** Images showing the enrichment of *Scel* and *Chrdl1* expression in somatosensory areas over motor and visual cortex. In the bottom panels, the single astrocyte segmentations are shown in green.

**B)** Expression heatmap showing the expression of layer astrocyte markers across cortical depth and areas (assayed over  $n=10$  tissue sections from one biological replicate).

**C)** Violin plots showing the quantification of single astrocyte expression of *Chrdl1* and *Scel* across cortical layers and areas. Number of cells across cortical areas: AM: 141, CG: 858, RS: 1276, M: 1298, S-M: 745, PT: 393, S-A: 2472, S-BF: 1231, S-L: 897, A: 838, PL: 690, V: 668 and AL: 686.  $n=1$  mouse, 10 tissue sections independently imaged.

Scalebar: 50  $\mu\text{m}$

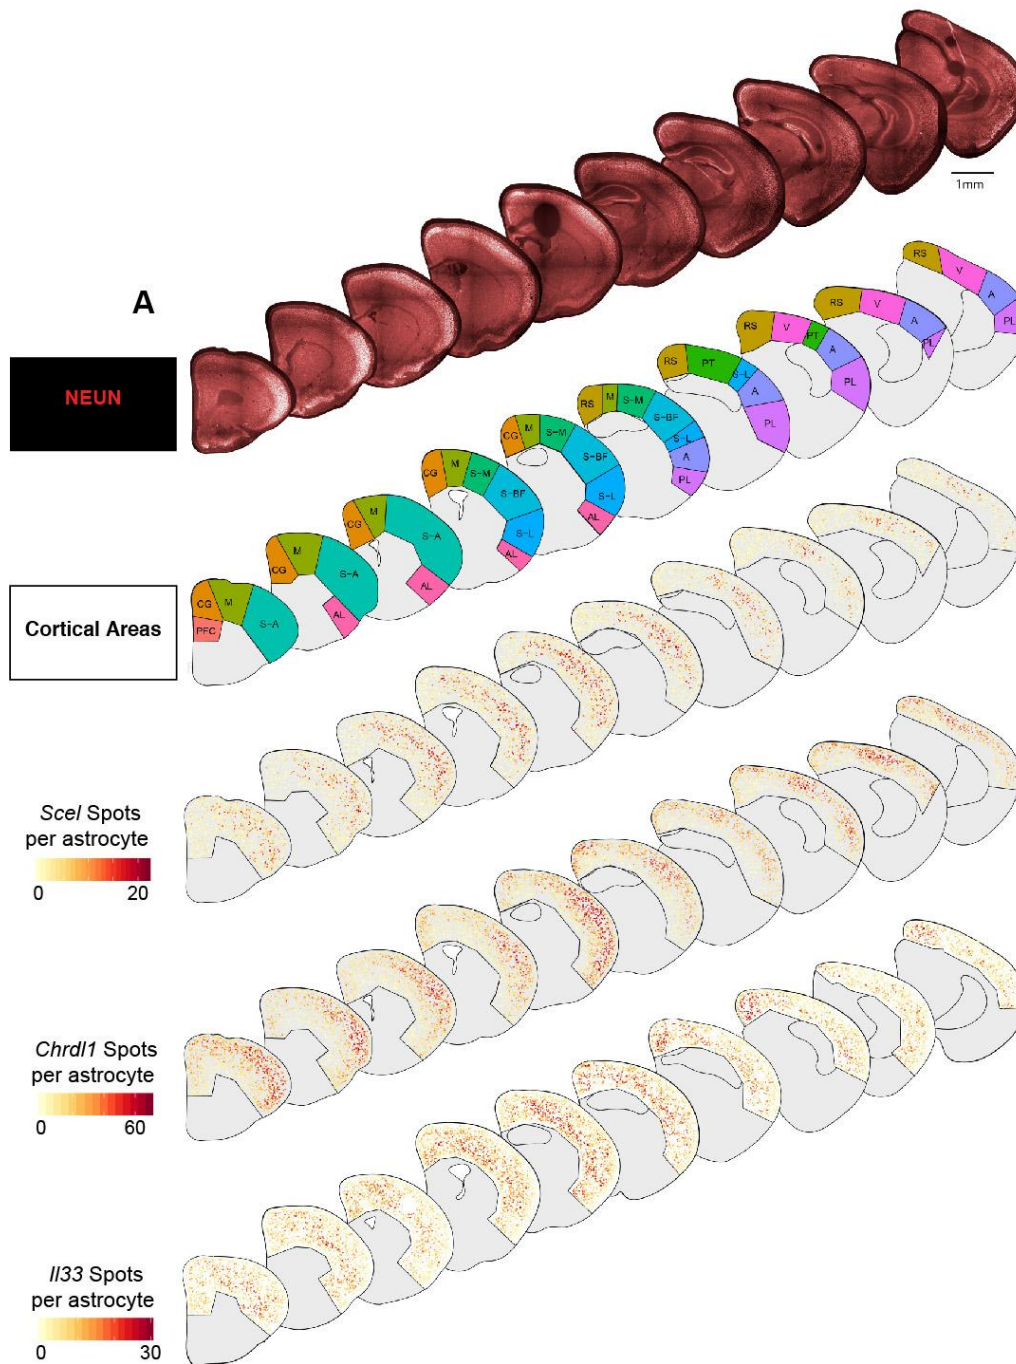1816  
18171818 **Supplementary Figure 22: Maps showing the single cell level distribution of select neuronal**  
1819 **subtypes.**1820 **A)** (First row) Low magnification images of P14 hemisections from ten anatomical levels assayed for NEUN IHC. (Second row) Maps of broad cortical areas included in analysis of regional  
1821 astrocyte gene expression. (Bottom rows) Maps showing single astrocyte expression of *Scel*,  
1822 *Chrdl1* and *Il33* across the cortex.  $n=1$  mouse, 10 tissue sections independently imaged.  
1823  
1824 Scalebar: 1 mm

1825  
1826  
1827  
1828  
1829  
1830  
1831  
1832  
1833  
1834  
1835  
1836  
1837  
1838  
1839  
1840  
1841  
1842  
1843  
1844  
1845  
1846  
1847  
1848  
1849  
1850  
1851  
1852  
1853  
1854  
1855  
1856  
1857  
1858  
1859  
1860  
1861  
1862  
1863  
1864  
1865  
1866  
1867  
1868  
1869  
1870  
1871  
1872  
1873  
1874  
1875

## Supplementary Table Legends

**Supplementary Table 1: Single cortical neuron smFISH dataset.** Table listing cellular, anatomical and gene expression measurements of 69,318 single neurons identified across the P14 cortex. The cluster assignments of 46,887 single neurons used for subtype identification across 8 broad cortical areas are also listed. Every row is a single neuron and the table columns are described in the “Supp Table 1 Metadata” sheet.

**Supplementary Table 2: Single cortical astrocyte smFISH screen dataset.** Table listing cellular, anatomical and gene expression measurements of 41,187 single astrocytes screened in the somatosensory cortex across two biological replicates. 46 candidate layer astrocyte markers as well as the pan-astrocyte marker *Aldh1l1* and the white matter astrocyte marker *Gfap* were multiplexed with the astrocyte marker *Glast* across multiple slides, these are listed under “Supp Table 2 Metadata”. Every row is a single astrocyte and the table columns are described in the metadata sheet.

**Supplementary Table 3: RNAScope probes used in this study.** Table listing all of the RNAScope probes, their mRNA target regions and ACD catalog numbers.

**Supplementary Table 4: Automated histology protocols and reagents.** Tables listing the automated 4-plex RNAScope smFISH and IHC protocol used on the Leica BOND RX and the consumable reagents.

**Supplementary Table 5: Imaging settings.** Tables listing the fluorophores, light sources, exposure times and emission filters used for mouse and human tissue imaging.

**Supplementary Table 6: The single neuron segmentation and gene expression quantification pipeline.** Table listing all of the steps and settings used in the Harmony software.

**Supplementary Table 7: The single astrocyte segmentation and gene expression quantification pipeline.** Table listing all of the steps and settings used in the Harmony software.

**Supplementary Table 8: List of abbreviations for cortical areas.** Table listing all the broad cortical areas examined in this study.

**Supplementary Table 9: Cortical layer astrocyte RNAseq data.** The RNAseq expression pattern and differential gene expression statistics of 159 candidate layer astrocyte markers. The list of 46 top genes screened with smFISH is also provided. The table columns are described in the “Supp Table 9 Metadata” sheet.

**Supplementary Table 10: Reconstruction of spatial expression– layer assignment probability of cells.** The matrix of posterior probability of cell assignment which shows the probability of each cell belonging to each spatial bin (see methods equation 6).

**Supplementary Table 11: Reconstruction of spatial expression – average profiles of later-restricted genes.** The table shows average reconstructed expression levels for 4963 genes that are detected in at least 145 scRNA-seq cells, including Kruskal–Wallis test p-value and q-value corrected with q value method.
